# Supplementary material for: Neutral and ionic reaction mechanisms for the allylation of aldehydes by bipyridine N,N′-dioxides
Source: Royal Society of Chemistry journal article supplement (doi:10.1039/b819545e), 2009-01-01
Supplement: b819545e.pdf [file b819545e.pdf]

Supporting information for

**Neutral and Ionic Reaction Mechanisms for Allylation of Aldehydes by Bipyridine *N,N'*-Dioxides**

Radim Hrdina,<sup>a</sup> František Opekar,<sup>b</sup> Jana Roithová<sup>a,c\*</sup> and Martin Kotora<sup>a,c\*</sup>

<sup>a</sup> Dept. of Organic and Nuclear Chemistry, Faculty of Science, Charles University, Hlavova 8, 128 43 Prague, Czech republic. Fax: +420 221 951 326; Tel: +420 221 951 334; E-mail:

[kotora@natur.cuni.cz](mailto:kotora@natur.cuni.cz), [roithova@natur.cuni.cz](mailto:roithova@natur.cuni.cz)

<sup>b</sup> Dept. of Analytical Chemistry, Faculty of Science, Charles University, Hlavova 8, 128 43

Prague, Czech republic. E-mail: [opekar@natur.cuni.cz](mailto:opekar@natur.cuni.cz),

<sup>c</sup> Institute of Organic Chemistry and Biochemistry, Academy of Sciences of the Czech republic, Flemingovo n. 2, 166 10 Prague, Czech Republic.

**Contents**

|             |                                  |   |
|-------------|----------------------------------|---|
| <b>I</b>    | <b>General methods</b>           | 1 |
| <b>II</b>   | <b>Conductivity measurements</b> | 2 |
| <b>III.</b> | <b>Calculations</b>              | 4 |
| <b>IV</b>   | <b>Reference</b>                 |   |

**I General methods**

All solvents unless otherwise stated were used as obtained. THF was distilled from sodium and benzophenone, and dichloromethane from CaH<sub>2</sub> under Ar. All other reagents were obtained from commercial sources. Bis(3-phenyltetrahydroisoquinoline) *N,N'*-dioxide **1** was prepared and resolved into enantiomers according the previously reported method.<sup>1</sup> All reactions were carried out under an argon atmosphere using Schlenk-tube technique.

**II. Conductivity measurements by CCD (300kHz/10V)**

The test solution conductivity was measured using a contactless conductivity detector (CCD). This approach fully eliminates any interfering interactions of the electrode surface with the solution. (At present, CCDs are very popular for detection in separation methods<sup>2</sup> and the fundamentals of the method can be found elsewhere.<sup>3</sup>)

The detection cell used in this work consisted of two 5 mm long stainless steel tubular electrodes (prepared from an injection syringe needle) placed on the outside of the PTFE tubing (i.d. 1.5 mm, o.d. 2 mm) with a gap between them of 2.5 mm. A sine-wave signal from a GFG 3015 (Instek) function generator, peak-to-peak voltage of 20 V and frequency of 300 kHz, was fed to one of the electrodes and the signal, the current whose magnitude depends on the conductivity of the detection space between the electrodes, is measured at the other electrode. The detector electronics was based on the scheme described in ref. 4; the electronics converts the alternating current to a d. c. voltage. The voltage signal cannot be transferred into conductivity units because its magnitude is not solely determined by the solution conductivity but, to a certain extent, also by the solution permittivity which depends on the actual solution composition. Therefore, the data presented can be related to the conductivity in the sense that a higher voltage indicates a higher conductivity (or a higher content of the ionic species) in the solution.

The test solution was aspirated into the detection cell using a hypodermic syringe from the vessel closed by a septum. All the measurements were carried out under laboratory temperature. A block scheme of the apparatus is shown in Fig. 1.

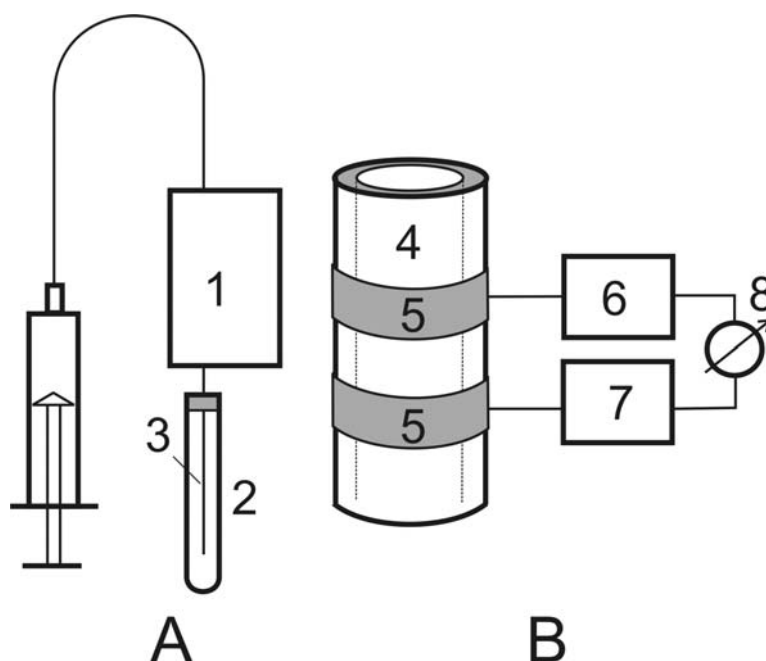

Fig. 1. A block scheme of the apparatus for contactless measurement of conductivity (A) and a detailed scheme of the detection cell and its connection to the detector electronics (B). 1 – the detector in the faradaic cage, 2 – vessel with sample closed with the septum, 3 – sampling needle, 4 – PTFE tubing, 5 – conductometric electrodes, 6 – sine-wave generator, 7 – electronics, 8 – voltmeter.

All the measurements were performed under the same conditions, stated values are relative. Stock solutions of allyltrichlorosilane in corresponding anhydrous solvents were prepared separately to avoid water contamination and were used for preparation of **1**/allyltrichlorosilane solutions (Table 1, in the text).

Entry 1. **1** (5 mg, 0.0112 mmol) dissolved in anhydrous CH<sub>3</sub>CN (1 mL), measured background conductivity related to voltage (1560 mV).

Entry 3. Allyltrichlorosilane (1.96 mg, 0.0112 mmol) dissolved in anhydrous CH<sub>3</sub>CN (1 mL), measured background conductivity related to voltage (1510 mV).

Entry 3. **1** (5 mg, 0.0112 mmol) and allyltrichlorosilane (1.96 mg, 0.0112 mmol) dissolved in CH<sub>3</sub>CN (1 mL), measured conductivity related to voltage (1780 mV).

Entry 4. Allyltrichlorosilane (3.92 mg, 0.0224 mmol) dissolved in anhydrous CH<sub>3</sub>CN (1 mL), measured background conductivity related to voltage (1560 mV).

Entry 5. **1** (10 mg, 0.0224 mmol) and allyltrichlorosilane (3.92 mg, 0.0224 mmol) dissolved in CH<sub>3</sub>CN (1 mL), measured conductivity related to voltage (2100 mV).

Entry 6. Allyltrichlorosilane (1.96 mg, 0.0112 mmol) dissolved in anhydrous CH<sub>2</sub>Cl<sub>2</sub> (1 mL), measured background conductivity related to voltage (188 mV).

Entry 7. **1** (5 mg, 0.0112 mmol) and allyltrichlorosilane (1.96 mg, 0.0112 mmol) dissolved in CH<sub>2</sub>Cl<sub>2</sub> (1 mL), measured conductivity related to voltage (458 mV).

Entry 8. Allyltrichlorosilane (1.96 mg, 0.0112 mmol) dissolved in anhydrous PhCl (1 mL), measured background conductivity related to voltage (55 mV).

Entry 9. **1** (5 mg, 0.0112 mmol) and allyltrichlorosilane (1.96 mg, 0.0112 mmol) dissolved in PhCl (1 mL), measured conductivity related to voltage (57 mV).

Entry 10. Allyltrichlorosilane (1.96 mg, 0.0112 mmol) dissolved in anhydrous EtOAc (1 mL), measured background conductivity related to voltage (62 mV).

Entry 11. **1** (5 mg, 0.0112 mmol) and allyltrichlorosilane (1.96 mg, 0.0112 mmol) dissolved in EtOAc (1 mL), measured conductivity related to voltage (63 mV).

### III Calculations

Geometries, total energies, and zero-point energies (ZPEs) of the optimized structures of the studied neutral and cationic complexes between **1** and  $(C_3H_5)SiCl_3$ . Further, SCRF energies obtained by single-point PCM calculations are given for the following solvents: acetonitrile (ACN), dichloromethane (DCM), chlorobenzene (PhCl), and toluene (TOL).

#### Three most stable arrangements found for the complex $[1 \cdot SiCl_3(C_3H_5)]$

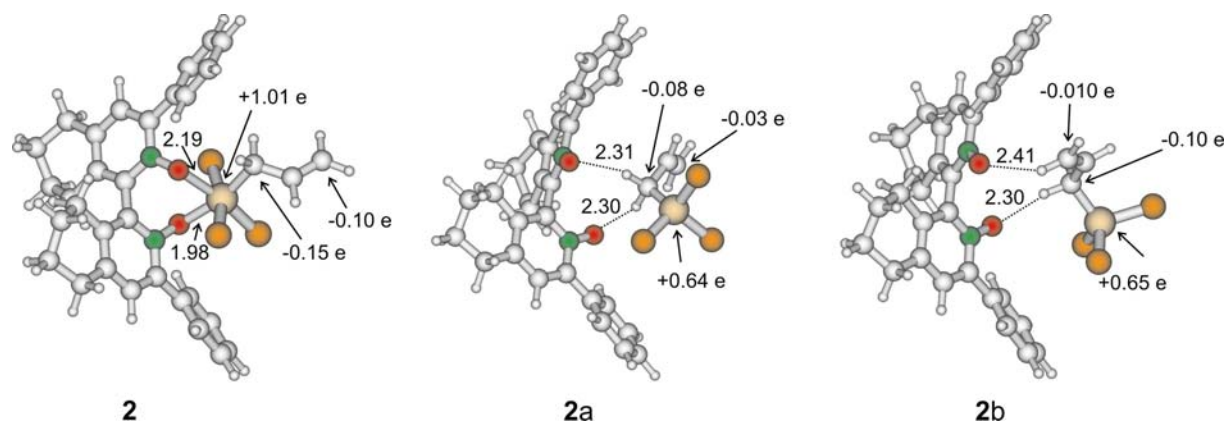

Note that although the isomers **2a** and **2b** lie lower in energy than the isomer **2** considered in the reaction mechanism; however, the mode of binding leads to a much smaller polarization of the allyl group and these forms will most probably not be reactive. It is also supported by the fact that such a non-specific binding would most probably not lead to the high ees as observed in the experiment. Other optimized geometries of the same complex with higher energies are listed in the following table as isomers **2c** – **2g** in that isomers **2c** – **2e** have similar geometry to the isomer **2** only the allyl group has slightly different orientation, whereas the binding in isomers **2f** and **2g** does not contain the direct O-Si bonds as it is the case for **2a** or **2b**. The conformational search was performed manually and we tried to start the optimization with all possible orientations and positions of the allyl group with respect to the ligand **1**.

| Isomer   | Total energy/Hartree<br>ZPE/Hartree<br>PCM energy/Hartree                           | Geometry      |               |             |                                  |           |           |
|----------|-------------------------------------------------------------------------------------|---------------|---------------|-------------|----------------------------------|-----------|-----------|
|          |                                                                                     | Center Number | Atomic Number | Atomic Type | Coordinates (Angstroms)<br>X Y Z |           |           |
| <b>2</b> | $E_{tot}$ : -3207.510633<br>ZPE: 0.592464<br>ACN: -3207.556904<br>DCM: -3207.549563 | 1             | 6             | 0           | 3.825451                         | -0.539714 | 1.793582  |
|          |                                                                                     | 2             | 6             | 0           | 3.836250                         | -0.209055 | 0.428766  |
|          |                                                                                     | 3             | 6             | 0           | 4.859060                         | -0.712327 | -0.390043 |
|          |                                                                                     | 4             | 6             | 0           | 5.856118                         | -1.524165 | 0.145991  |
|          |                                                                                     | 5             | 6             | 0           | 5.848313                         | -1.835599 | 1.506080  |
|          |                                                                                     | 6             | 6             | 0           | 4.831543                         | -1.341510 | 2.325731  |
|          |                                                                                     | 7             | 6             | 0           | 2.849325                         | 0.725859  | -0.149106 |

|                                        |    |    |   |           |           |           |
|----------------------------------------|----|----|---|-----------|-----------|-----------|
| PhCl: -3207.54374<br>TOL: -3207.530282 | 8  | 6  | 0 | 3.216249  | 1.747574  | -1.019826 |
|                                        | 9  | 6  | 0 | 2.296943  | 2.635410  | -1.575688 |
|                                        | 10 | 6  | 0 | 0.953942  | 2.548254  | -1.164117 |
|                                        | 11 | 6  | 0 | 0.613650  | 1.553934  | -0.244060 |
|                                        | 12 | 7  | 0 | 1.525060  | 0.636669  | 0.185643  |
|                                        | 13 | 6  | 0 | 2.756917  | 3.648873  | -2.603859 |
|                                        | 14 | 6  | 0 | 1.742755  | 4.771083  | -2.851243 |
|                                        | 15 | 6  | 0 | 0.337903  | 4.183101  | -3.010333 |
|                                        | 16 | 6  | 0 | -0.104810 | 3.488805  | -1.715309 |
|                                        | 17 | 6  | 0 | -0.748256 | 1.438478  | 0.351208  |
|                                        | 18 | 6  | 0 | -1.230389 | 2.338879  | 1.301650  |
|                                        | 19 | 6  | 0 | -2.581404 | 2.231256  | 1.687892  |
|                                        | 20 | 6  | 0 | -3.374315 | 1.271058  | 1.066533  |
|                                        | 21 | 6  | 0 | -2.864292 | 0.337716  | 0.164983  |
|                                        | 22 | 7  | 0 | -1.531785 | 0.427580  | -0.117968 |
|                                        | 23 | 6  | 0 | -0.313093 | 3.385979  | 1.910506  |
|                                        | 24 | 6  | 0 | -0.859061 | 3.952710  | 3.227789  |
|                                        | 25 | 6  | 0 | -2.327045 | 4.358812  | 3.070721  |
|                                        | 26 | 6  | 0 | -3.181933 | 3.127388  | 2.751295  |
|                                        | 27 | 6  | 0 | -3.732590 | -0.652379 | -0.500721 |
|                                        | 28 | 6  | 0 | -3.627979 | -0.915825 | -1.875504 |
|                                        | 29 | 6  | 0 | -4.546050 | -1.759763 | -2.493435 |
|                                        | 30 | 6  | 0 | -5.560446 | -2.365091 | -1.750586 |
|                                        | 31 | 6  | 0 | -5.656938 | -2.123855 | -0.379242 |
|                                        | 32 | 6  | 0 | -4.752374 | -1.268275 | 0.242338  |
|                                        | 33 | 8  | 0 | -0.933371 | -0.484157 | -0.893680 |
|                                        | 34 | 14 | 0 | 0.051106  | -2.010529 | -0.097277 |
|                                        | 35 | 17 | 0 | -1.217859 | -3.406736 | -1.134042 |
|                                        | 36 | 8  | 0 | 1.075831  | -0.360798 | 0.920982  |
|                                        | 37 | 17 | 0 | 1.373824  | -1.618688 | -1.884738 |
|                                        | 38 | 6  | 0 | 1.336732  | -3.125698 | 0.835592  |
|                                        | 39 | 17 | 0 | -1.276057 | -1.865530 | 1.743065  |
|                                        | 40 | 1  | 0 | 2.936518  | 3.111729  | -3.545878 |
|                                        | 41 | 1  | 0 | 2.031593  | 5.339522  | -3.741129 |
|                                        | 42 | 1  | 0 | -0.386343 | 4.962567  | -3.268372 |
|                                        | 43 | 1  | 0 | -1.035041 | 2.936713  | -1.881271 |
|                                        | 44 | 1  | 0 | 4.266991  | 1.831491  | -1.274874 |
|                                        | 45 | 1  | 0 | -4.434121 | 1.221005  | 1.288590  |
|                                        | 46 | 1  | 0 | 0.680365  | 2.954438  | 2.065642  |
|                                        | 47 | 1  | 0 | -0.247555 | 4.807376  | 3.534703  |
|                                        | 48 | 1  | 0 | -2.700053 | 4.838793  | 3.981006  |
|                                        | 49 | 1  | 0 | -3.299858 | 2.523569  | 3.662185  |
|                                        | 50 | 1  | 0 | -0.335858 | 4.258155  | -0.965819 |
|                                        | 51 | 1  | 0 | 0.334902  | 3.460117  | -3.835786 |
|                                        | 52 | 1  | 0 | 1.751372  | 5.476286  | -2.009299 |
|                                        | 53 | 1  | 0 | 3.728064  | 4.057142  | -2.301080 |
|                                        | 54 | 1  | 0 | -0.179245 | 4.212755  | 1.199790  |
|                                        | 55 | 1  | 0 | -0.770477 | 3.197711  | 4.019200  |
|                                        | 56 | 1  | 0 | -2.418538 | 5.097624  | 2.263364  |
|                                        | 57 | 1  | 0 | -4.195126 | 3.417435  | 2.450563  |

|           |                                                                                                                                                                            |    |   |   |           |           |           |
|-----------|----------------------------------------------------------------------------------------------------------------------------------------------------------------------------|----|---|---|-----------|-----------|-----------|
|           |                                                                                                                                                                            | 58 | 1 | 0 | 3.024140  | -0.179291 | 2.426515  |
|           |                                                                                                                                                                            | 59 | 1 | 0 | 4.814599  | -1.590113 | 3.382366  |
|           |                                                                                                                                                                            | 60 | 1 | 0 | 6.623552  | -2.471039 | 1.923662  |
|           |                                                                                                                                                                            | 61 | 1 | 0 | 6.630792  | -1.922634 | -0.501821 |
|           |                                                                                                                                                                            | 62 | 1 | 0 | 4.847351  | -0.499738 | -1.453992 |
|           |                                                                                                                                                                            | 63 | 1 | 0 | -2.822918 | -0.475834 | -2.449984 |
|           |                                                                                                                                                                            | 64 | 1 | 0 | -4.455809 | -1.958464 | -3.556614 |
|           |                                                                                                                                                                            | 65 | 1 | 0 | -6.264163 | -3.034866 | -2.235803 |
|           |                                                                                                                                                                            | 66 | 1 | 0 | -6.427739 | -2.611492 | 0.209418  |
|           |                                                                                                                                                                            | 67 | 1 | 0 | -4.806677 | -1.109443 | 1.314318  |
|           |                                                                                                                                                                            | 68 | 6 | 0 | 0.905144  | -4.534510 | 1.087421  |
|           |                                                                                                                                                                            | 69 | 1 | 0 | 2.272013  | -3.102053 | 0.271162  |
|           |                                                                                                                                                                            | 70 | 1 | 0 | 1.499703  | -2.610165 | 1.787380  |
|           |                                                                                                                                                                            | 71 | 6 | 0 | 1.549727  | -5.621856 | 0.656427  |
|           |                                                                                                                                                                            | 72 | 1 | 0 | -0.001903 | -4.656967 | 1.677519  |
|           |                                                                                                                                                                            | 73 | 1 | 0 | 1.189621  | -6.622720 | 0.877699  |
|           |                                                                                                                                                                            | 74 | 1 | 0 | 2.453019  | -5.549340 | 0.054938  |
| <b>2a</b> | <p><math>E_{\text{tot}}</math>: -3207.5401055</p> <p>ZPE: 0.591762</p> <p>ACN: -3207.559016</p> <p>DCM: -3207.555542</p> <p>PhCl: -3207.55247</p> <p>TOL: -3207.547275</p> | 1  | 6 | 0 | -4.054498 | 1.252702  | 1.707650  |
|           |                                                                                                                                                                            | 2  | 6 | 0 | -3.924043 | 1.030522  | 0.325583  |
|           |                                                                                                                                                                            | 3  | 6 | 0 | -4.577203 | 1.904752  | -0.561151 |
|           |                                                                                                                                                                            | 4  | 6 | 0 | -5.349385 | 2.961950  | -0.083795 |
|           |                                                                                                                                                                            | 5  | 6 | 0 | -5.484569 | 3.163596  | 1.289890  |
|           |                                                                                                                                                                            | 6  | 6 | 0 | -4.835046 | 2.305539  | 2.179406  |
|           |                                                                                                                                                                            | 7  | 6 | 0 | -3.176289 | -0.116038 | -0.239637 |
|           |                                                                                                                                                                            | 8  | 6 | 0 | -3.652115 | -0.835460 | -1.329072 |
|           |                                                                                                                                                                            | 9  | 6 | 0 | -2.948894 | -1.888892 | -1.913303 |
|           |                                                                                                                                                                            | 10 | 6 | 0 | -1.696937 | -2.217545 | -1.372610 |
|           |                                                                                                                                                                            | 11 | 6 | 0 | -1.234532 | -1.511761 | -0.256455 |
|           |                                                                                                                                                                            | 12 | 7 | 0 | -1.964707 | -0.492537 | 0.310499  |
|           |                                                                                                                                                                            | 13 | 6 | 0 | -3.533619 | -2.636045 | -3.095037 |
|           |                                                                                                                                                                            | 14 | 6 | 0 | -2.871521 | -4.000122 | -3.315646 |
|           |                                                                                                                                                                            | 15 | 6 | 0 | -1.349116 | -3.840630 | -3.311245 |
|           |                                                                                                                                                                            | 16 | 6 | 0 | -0.842814 | -3.328624 | -1.954988 |
|           |                                                                                                                                                                            | 17 | 6 | 0 | 0.055384  | -1.825229 | 0.421023  |
|           |                                                                                                                                                                            | 18 | 6 | 0 | 0.129249  | -2.506018 | 1.640556  |
|           |                                                                                                                                                                            | 19 | 6 | 0 | 1.391117  | -2.817839 | 2.168248  |
|           |                                                                                                                                                                            | 20 | 6 | 0 | 2.514500  | -2.400534 | 1.455147  |
|           |                                                                                                                                                                            | 21 | 6 | 0 | 2.438751  | -1.696045 | 0.259105  |
|           |                                                                                                                                                                            | 22 | 7 | 0 | 1.184618  | -1.426935 | -0.257757 |
|           |                                                                                                                                                                            | 23 | 6 | 0 | -1.152577 | -2.907029 | 2.346965  |
|           |                                                                                                                                                                            | 24 | 6 | 0 | -0.927498 | -3.403303 | 3.782577  |
|           |                                                                                                                                                                            | 25 | 6 | 0 | 0.280988  | -4.339417 | 3.866817  |
|           |                                                                                                                                                                            | 26 | 6 | 0 | 1.550611  | -3.579246 | 3.468703  |
|           |                                                                                                                                                                            | 27 | 6 | 0 | 3.653595  | -1.239246 | -0.454490 |
|           |                                                                                                                                                                            | 28 | 6 | 0 | 3.788897  | -1.306753 | -1.852404 |
|           |                                                                                                                                                                            | 29 | 6 | 0 | 4.988709  | -0.945966 | -2.460776 |
|           |                                                                                                                                                                            | 30 | 6 | 0 | 6.067071  | -0.496956 | -1.696268 |
|           |                                                                                                                                                                            | 31 | 6 | 0 | 5.938885  | -0.410781 | -0.310058 |
|           |                                                                                                                                                                            | 32 | 6 | 0 | 4.744449  | -0.780268 | 0.304539  |
|           |                                                                                                                                                                            | 33 | 8 | 0 | 1.055259  | -0.808189 | -1.387857 |

|           |                                                                                                                                        |    |    |   |           |           |           |
|-----------|----------------------------------------------------------------------------------------------------------------------------------------|----|----|---|-----------|-----------|-----------|
|           |                                                                                                                                        | 34 | 14 | 0 | 1.462916  | 3.371378  | 0.205095  |
|           |                                                                                                                                        | 35 | 17 | 0 | 2.819173  | 3.981887  | -1.235532 |
|           |                                                                                                                                        | 36 | 8  | 0 | -1.501732 | 0.106253  | 1.359762  |
|           |                                                                                                                                        | 37 | 6  | 0 | 0.123183  | 2.280282  | -0.499042 |
|           |                                                                                                                                        | 38 | 17 | 0 | 0.666130  | 5.083535  | 1.069488  |
|           |                                                                                                                                        | 39 | 17 | 0 | 2.522922  | 2.370076  | 1.681412  |
|           |                                                                                                                                        | 40 | 1  | 0 | -3.404290 | -2.025329 | -4.000540 |
|           |                                                                                                                                        | 41 | 1  | 0 | -3.216350 | -4.432781 | -4.260871 |
|           |                                                                                                                                        | 42 | 1  | 0 | -0.854407 | -4.788526 | -3.548215 |
|           |                                                                                                                                        | 43 | 1  | 0 | 0.178524  | -2.952867 | -2.063261 |
|           |                                                                                                                                        | 44 | 1  | 0 | -4.628051 | -0.563858 | -1.717753 |
|           |                                                                                                                                        | 45 | 1  | 0 | 3.503830  | -2.647095 | 1.826004  |
|           |                                                                                                                                        | 46 | 1  | 0 | -1.821017 | -2.041530 | 2.359098  |
|           |                                                                                                                                        | 47 | 1  | 0 | -1.835157 | -3.900764 | 4.140613  |
|           |                                                                                                                                        | 48 | 1  | 0 | 0.391529  | -4.744858 | 4.878244  |
|           |                                                                                                                                        | 49 | 1  | 0 | 1.805374  | -2.866643 | 4.266689  |
|           |                                                                                                                                        | 50 | 1  | 0 | -0.805561 | -4.160425 | -1.237765 |
|           |                                                                                                                                        | 51 | 1  | 0 | -1.062020 | -3.131546 | -4.098588 |
|           |                                                                                                                                        | 52 | 1  | 0 | -3.173435 | -4.693693 | -2.519284 |
|           |                                                                                                                                        | 53 | 1  | 0 | -4.615888 | -2.744137 | -2.956472 |
|           |                                                                                                                                        | 54 | 1  | 0 | -1.650500 | -3.691923 | 1.760447  |
|           |                                                                                                                                        | 55 | 1  | 0 | -0.759672 | -2.542740 | 4.443076  |
|           |                                                                                                                                        | 56 | 1  | 0 | 0.133420  | -5.195509 | 3.194806  |
|           |                                                                                                                                        | 57 | 1  | 0 | 2.405991  | -4.260449 | 3.388355  |
|           |                                                                                                                                        | 58 | 1  | 0 | -3.532844 | 0.606431  | 2.399929  |
|           |                                                                                                                                        | 59 | 1  | 0 | -4.930098 | 2.460154  | 3.250172  |
|           |                                                                                                                                        | 60 | 1  | 0 | -6.082902 | 3.988846  | 1.664677  |
|           |                                                                                                                                        | 61 | 1  | 0 | -5.835912 | 3.632425  | -0.786038 |
|           |                                                                                                                                        | 62 | 1  | 0 | -4.453527 | 1.770706  | -1.631226 |
|           |                                                                                                                                        | 63 | 1  | 0 | 2.948934  | -1.630332 | -2.451239 |
|           |                                                                                                                                        | 64 | 1  | 0 | 5.078346  | -1.009700 | -3.541301 |
|           |                                                                                                                                        | 65 | 1  | 0 | 6.995715  | -0.205958 | -2.178380 |
|           |                                                                                                                                        | 66 | 1  | 0 | 6.763227  | -0.044829 | 0.294583  |
|           |                                                                                                                                        | 67 | 1  | 0 | 4.645476  | -0.684984 | 1.381186  |
|           |                                                                                                                                        | 68 | 6  | 0 | -0.765039 | 2.985831  | -1.486276 |
|           |                                                                                                                                        | 69 | 1  | 0 | 0.614487  | 1.407826  | -0.951837 |
|           |                                                                                                                                        | 70 | 1  | 0 | -0.452864 | 1.901658  | 0.358572  |
|           |                                                                                                                                        | 71 | 6  | 0 | -0.778508 | 2.746526  | -2.799101 |
|           |                                                                                                                                        | 72 | 1  | 0 | -1.433514 | 3.741249  | -1.075538 |
|           |                                                                                                                                        | 73 | 1  | 0 | -1.440955 | 3.290496  | -3.465981 |
|           |                                                                                                                                        | 74 | 1  | 0 | -0.131229 | 1.998005  | -3.248304 |
| <b>2b</b> | $E_{\text{tot}}$ : -3207.5388008<br>ZPE: 0.591901<br>ACN: -3207.557644<br>DCM: -3207.554478<br>PhCl: -3207.551818<br>TOL: -3207.546159 | 1  | 6  | 0 | -3.027425 | -0.461188 | 4.033873  |
|           |                                                                                                                                        | 2  | 6  | 0 | -2.747813 | -0.360010 | 2.547958  |
|           |                                                                                                                                        | 3  | 6  | 0 | -1.926185 | 0.643735  | 2.013317  |
|           |                                                                                                                                        | 4  | 6  | 0 | -1.259116 | 1.682905  | 2.895321  |
|           |                                                                                                                                        | 5  | 6  | 0 | -1.338367 | 1.353256  | 4.393066  |
|           |                                                                                                                                        | 6  | 6  | 0 | -2.729112 | 0.843402  | 4.780262  |
|           |                                                                                                                                        | 7  | 6  | 0 | -3.310300 | -1.278359 | 1.661968  |
|           |                                                                                                                                        | 8  | 6  | 0 | -3.096375 | -1.242401 | 0.288560  |
|           |                                                                                                                                        | 9  | 7  | 0 | -2.311899 | -0.222476 | -0.220189 |

|  |  |    |    |   |           |           |           |
|--|--|----|----|---|-----------|-----------|-----------|
|  |  | 10 | 6  | 0 | -1.736718 | 0.696961  | 0.628598  |
|  |  | 11 | 6  | 0 | -0.943766 | 1.764868  | -0.042888 |
|  |  | 12 | 6  | 0 | -1.537748 | 2.819499  | -0.744987 |
|  |  | 13 | 6  | 0 | -0.718109 | 3.816113  | -1.293806 |
|  |  | 14 | 6  | 0 | 0.660586  | 3.684014  | -1.132265 |
|  |  | 15 | 6  | 0 | 1.250388  | 2.621827  | -0.456942 |
|  |  | 16 | 7  | 0 | 0.421289  | 1.665929  | 0.102014  |
|  |  | 17 | 6  | 0 | -3.049132 | 2.870407  | -0.871850 |
|  |  | 18 | 6  | 0 | -3.543500 | 3.927824  | -1.869989 |
|  |  | 19 | 6  | 0 | -2.770664 | 5.241170  | -1.723329 |
|  |  | 20 | 6  | 0 | -1.289665 | 5.005773  | -2.037834 |
|  |  | 21 | 8  | 0 | 0.913491  | 0.681008  | 0.783130  |
|  |  | 22 | 8  | 0 | -2.111604 | -0.111474 | -1.491794 |
|  |  | 23 | 6  | 0 | 1.455615  | -2.579016 | 0.168275  |
|  |  | 24 | 6  | 0 | 0.767958  | -3.342096 | -0.932866 |
|  |  | 25 | 6  | 0 | -0.086620 | -2.809536 | -1.808162 |
|  |  | 26 | 14 | 0 | 3.314510  | -2.497991 | -0.029951 |
|  |  | 27 | 17 | 0 | 4.197751  | -1.747675 | 1.691216  |
|  |  | 28 | 17 | 0 | 4.099953  | -4.401754 | -0.321861 |
|  |  | 29 | 17 | 0 | 3.899488  | -1.335474 | -1.631747 |
|  |  | 30 | 1  | 0 | -1.176575 | 4.835899  | -3.118616 |
|  |  | 31 | 1  | 0 | -3.175846 | 6.009337  | -2.390677 |
|  |  | 32 | 1  | 0 | -4.617712 | 4.086484  | -1.727133 |
|  |  | 33 | 1  | 0 | -3.399456 | 1.882303  | -1.182527 |
|  |  | 34 | 6  | 0 | 2.720872  | 2.509287  | -0.324462 |
|  |  | 35 | 1  | 0 | 1.319569  | 4.452255  | -1.522965 |
|  |  | 36 | 6  | 0 | -3.685748 | -2.254664 | -0.617991 |
|  |  | 37 | 1  | 0 | -3.968884 | -2.051707 | 2.043231  |
|  |  | 38 | 1  | 0 | -0.211560 | 1.765379  | 2.592434  |
|  |  | 39 | 1  | 0 | -1.070383 | 2.241962  | 4.974273  |
|  |  | 40 | 1  | 0 | -2.797653 | 0.678109  | 5.860812  |
|  |  | 41 | 1  | 0 | -2.407494 | -1.264684 | 4.458082  |
|  |  | 42 | 1  | 0 | -3.480897 | 3.068950  | 0.119078  |
|  |  | 43 | 1  | 0 | -3.415433 | 3.550495  | -2.892969 |
|  |  | 44 | 1  | 0 | -2.877389 | 5.621169  | -0.698355 |
|  |  | 45 | 1  | 0 | -0.694157 | 5.897396  | -1.808833 |
|  |  | 46 | 1  | 0 | -1.726938 | 2.659794  | 2.708696  |
|  |  | 47 | 1  | 0 | -0.594620 | 0.583405  | 4.636574  |
|  |  | 48 | 1  | 0 | -3.484453 | 1.598969  | 4.525366  |
|  |  | 49 | 1  | 0 | -4.068069 | -0.770516 | 4.187365  |
|  |  | 50 | 1  | 0 | 1.287443  | -3.056051 | 1.144624  |
|  |  | 51 | 1  | 0 | 1.096407  | -1.543853 | 0.241224  |
|  |  | 52 | 1  | 0 | 1.006503  | -4.403117 | -0.997549 |
|  |  | 53 | 1  | 0 | -0.548393 | -3.425284 | -2.574690 |
|  |  | 54 | 1  | 0 | -0.381453 | -1.763420 | -1.785551 |
|  |  | 55 | 6  | 0 | 3.351380  | 2.124642  | 0.871223  |
|  |  | 56 | 6  | 0 | 4.741043  | 2.130179  | 0.966049  |
|  |  | 57 | 6  | 0 | 5.526661  | 2.499727  | -0.126935 |
|  |  | 58 | 6  | 0 | 4.911846  | 2.867367  | -1.323791 |
|  |  | 59 | 6  | 0 | 3.522106  | 2.874163  | -1.420415 |



|           |                                                                                                                                       |    |    |   |           |           |           |
|-----------|---------------------------------------------------------------------------------------------------------------------------------------|----|----|---|-----------|-----------|-----------|
|           |                                                                                                                                       | 60 | 1  | 0 | 2.749059  | 1.812465  | 1.713120  |
|           |                                                                                                                                       | 61 | 1  | 0 | 5.212041  | 1.832752  | 1.897959  |
|           |                                                                                                                                       | 62 | 1  | 0 | 6.609849  | 2.489189  | -0.049775 |
|           |                                                                                                                                       | 63 | 1  | 0 | 5.512122  | 3.138980  | -2.187006 |
|           |                                                                                                                                       | 64 | 1  | 0 | 3.052067  | 3.139416  | -2.362436 |
|           |                                                                                                                                       | 65 | 6  | 0 | -4.226631 | -1.933037 | -1.875394 |
|           |                                                                                                                                       | 66 | 6  | 0 | -4.845050 | -2.914352 | -2.646861 |
|           |                                                                                                                                       | 67 | 6  | 0 | -4.923708 | -4.232280 | -2.192990 |
|           |                                                                                                                                       | 68 | 6  | 0 | -4.376248 | -4.566222 | -0.954137 |
|           |                                                                                                                                       | 69 | 6  | 0 | -3.764299 | -3.586870 | -0.174999 |
|           |                                                                                                                                       | 70 | 1  | 0 | -4.145611 | -0.919552 | -2.242631 |
|           |                                                                                                                                       | 71 | 1  | 0 | -5.263344 | -2.646912 | -3.612880 |
|           |                                                                                                                                       | 72 | 1  | 0 | -5.398947 | -4.994052 | -2.804090 |
|           |                                                                                                                                       | 73 | 1  | 0 | -4.414815 | -5.590942 | -0.596608 |
|           |                                                                                                                                       | 74 | 1  | 0 | -3.318142 | -3.862368 | 0.775471  |
| <b>2c</b> | $E_{\text{tot}}$ : -3207.510514<br>ZPE: 0.592558<br>ACN: -3207.556775<br>DCM: -3207.549107<br>PhCl: -3207.543513<br>TOL: -3207.530097 | 1  | 6  | 0 | 3.662154  | -1.333696 | 1.733789  |
|           |                                                                                                                                       | 2  | 6  | 0 | 3.767785  | -0.990532 | 0.376765  |
|           |                                                                                                                                       | 3  | 6  | 0 | 4.736630  | -1.622709 | -0.419170 |
|           |                                                                                                                                       | 4  | 6  | 0 | 5.591071  | -2.572027 | 0.133384  |
|           |                                                                                                                                       | 5  | 6  | 0 | 5.495256  | -2.892830 | 1.488351  |
|           |                                                                                                                                       | 6  | 6  | 0 | 4.530535  | -2.272310 | 2.283105  |
|           |                                                                                                                                       | 7  | 6  | 0 | 2.958941  | 0.093861  | -0.212263 |
|           |                                                                                                                                       | 8  | 6  | 0 | 3.516102  | 1.043355  | -1.067919 |
|           |                                                                                                                                       | 9  | 6  | 0 | 2.779760  | 2.088313  | -1.618248 |
|           |                                                                                                                                       | 10 | 6  | 0 | 1.443593  | 2.259126  | -1.204545 |
|           |                                                                                                                                       | 11 | 6  | 0 | 0.917145  | 1.335813  | -0.300986 |
|           |                                                                                                                                       | 12 | 7  | 0 | 1.639651  | 0.254041  | 0.099958  |
|           |                                                                                                                                       | 13 | 6  | 0 | 3.424088  | 3.006465  | -2.636336 |
|           |                                                                                                                                       | 14 | 6  | 0 | 2.649376  | 4.308816  | -2.865808 |
|           |                                                                                                                                       | 15 | 6  | 0 | 1.155323  | 4.012016  | -3.021070 |
|           |                                                                                                                                       | 16 | 6  | 0 | 0.590099  | 3.399895  | -1.732547 |
|           |                                                                                                                                       | 17 | 6  | 0 | -0.429602 | 1.499015  | 0.317321  |
|           |                                                                                                                                       | 18 | 6  | 0 | -0.692563 | 2.451385  | 1.303798  |
|           |                                                                                                                                       | 19 | 6  | 0 | -2.025054 | 2.612302  | 1.727893  |
|           |                                                                                                                                       | 20 | 6  | 0 | -3.010633 | 1.847468  | 1.107670  |
|           |                                                                                                                                       | 21 | 6  | 0 | -2.723394 | 0.862925  | 0.166011  |
|           |                                                                                                                                       | 22 | 7  | 0 | -1.408111 | 0.681394  | -0.163351 |
|           |                                                                                                                                       | 23 | 6  | 0 | 0.435682  | 3.270035  | 1.908799  |
|           |                                                                                                                                       | 24 | 6  | 0 | 0.049541  | 3.909154  | 3.249499  |
|           |                                                                                                                                       | 25 | 6  | 0 | -1.308911 | 4.607248  | 3.142151  |
|           |                                                                                                                                       | 26 | 6  | 0 | -2.403748 | 3.581561  | 2.829150  |
|           |                                                                                                                                       | 27 | 6  | 0 | -3.786938 | 0.086812  | -0.503129 |
|           |                                                                                                                                       | 28 | 6  | 0 | -3.770190 | -0.130747 | -1.891058 |
|           |                                                                                                                                       | 29 | 6  | 0 | -4.857324 | -0.736071 | -2.515778 |
|           |                                                                                                                                       | 30 | 6  | 0 | -5.963246 | -1.147068 | -1.767912 |
|           |                                                                                                                                       | 31 | 6  | 0 | -5.974426 | -0.957796 | -0.385658 |
|           |                                                                                                                                       | 32 | 6  | 0 | -4.894863 | -0.342348 | 0.243594  |
|           |                                                                                                                                       | 33 | 8  | 0 | -1.032658 | -0.313251 | -0.948988 |
|           |                                                                                                                                       | 34 | 14 | 0 | -0.138254 | -2.050593 | -0.032658 |
|           |                                                                                                                                       | 35 | 6  | 0 | -1.397953 | -3.179010 | -0.975472 |

|           |                                                    |    |    |   |           |           |           |
|-----------|----------------------------------------------------|----|----|---|-----------|-----------|-----------|
|           |                                                    | 36 | 8  | 0 | 0.993156  | -0.656714 | 0.834692  |
|           |                                                    | 37 | 17 | 0 | 1.168543  | -1.882145 | -1.885567 |
|           |                                                    | 38 | 17 | 0 | 1.051373  | -3.600286 | 0.912377  |
|           |                                                    | 39 | 17 | 0 | -1.395307 | -1.644013 | 1.777492  |
|           |                                                    | 40 | 1  | 0 | 3.489793  | 2.453053  | -3.583797 |
|           |                                                    | 41 | 1  | 0 | 3.041154  | 4.818006  | -3.752039 |
|           |                                                    | 42 | 1  | 0 | 0.598926  | 4.923588  | -3.262216 |
|           |                                                    | 43 | 1  | 0 | -0.431948 | 3.045906  | -1.897729 |
|           |                                                    | 44 | 1  | 0 | 4.566994  | 0.938142  | -1.311998 |
|           |                                                    | 45 | 1  | 0 | -4.052803 | 2.003816  | 1.363251  |
|           |                                                    | 46 | 1  | 0 | 1.320649  | 2.638423  | 2.033306  |
|           |                                                    | 47 | 1  | 0 | 0.829817  | 4.615649  | 3.550723  |
|           |                                                    | 48 | 1  | 0 | -1.551849 | 5.134004  | 4.070553  |
|           |                                                    | 49 | 1  | 0 | -2.615827 | 2.992939  | 3.732941  |
|           |                                                    | 50 | 1  | 0 | 0.520738  | 4.186980  | -0.969293 |
|           |                                                    | 51 | 1  | 0 | 1.004281  | 3.317415  | -3.857130 |
|           |                                                    | 52 | 1  | 0 | 2.801483  | 4.989357  | -2.017387 |
|           |                                                    | 53 | 1  | 0 | 4.458201  | 3.210630  | -2.336233 |
|           |                                                    | 54 | 1  | 0 | 0.724837  | 4.066342  | 1.209133  |
|           |                                                    | 55 | 1  | 0 | 0.003581  | 3.136030  | 4.026807  |
|           |                                                    | 56 | 1  | 0 | -1.269258 | 5.366097  | 2.349192  |
|           |                                                    | 57 | 1  | 0 | -3.344794 | 4.078698  | 2.567034  |
|           |                                                    | 58 | 1  | 0 | 2.894160  | -0.880154 | 2.347042  |
|           |                                                    | 59 | 1  | 0 | 4.439956  | -2.531773 | 3.333085  |
|           |                                                    | 60 | 1  | 0 | 6.159879  | -3.635368 | 1.919829  |
|           |                                                    | 61 | 1  | 0 | 6.321769  | -3.069555 | -0.496709 |
|           |                                                    | 62 | 1  | 0 | 4.789008  | -1.400270 | -1.479892 |
|           |                                                    | 63 | 1  | 0 | -2.905528 | 0.168398  | -2.470543 |
|           |                                                    | 64 | 1  | 0 | -4.837523 | -0.892720 | -3.589941 |
|           |                                                    | 65 | 1  | 0 | -6.805186 | -1.625601 | -2.259184 |
|           |                                                    | 66 | 1  | 0 | -6.817900 | -1.299277 | 0.206215  |
|           |                                                    | 67 | 1  | 0 | -4.892602 | -0.224067 | 1.322148  |
|           |                                                    | 68 | 1  | 0 | -0.735255 | -3.826065 | -1.562218 |
|           |                                                    | 69 | 6  | 0 | -2.311061 | -4.024233 | -0.147157 |
|           |                                                    | 70 | 1  | 0 | -1.959732 | -2.559789 | -1.679775 |
|           |                                                    | 71 | 6  | 0 | -3.636364 | -4.101385 | -0.291596 |
|           |                                                    | 72 | 1  | 0 | -1.828164 | -4.639167 | 0.611047  |
|           |                                                    | 73 | 1  | 0 | -4.238517 | -4.757434 | 0.331394  |
|           |                                                    | 74 | 1  | 0 | -4.166758 | -3.509508 | -1.033172 |
| <b>2d</b> | $E_{\text{tot}}$ : -3207. 5102168<br>ZPE: 0.592071 | 1  | 6  | 0 | 3.050724  | 3.435571  | -2.584539 |
|           |                                                    | 2  | 6  | 0 | 2.524130  | 2.451130  | -1.560284 |
|           |                                                    | 3  | 6  | 0 | 1.183800  | 2.463215  | -1.134568 |
|           |                                                    | 4  | 6  | 0 | 0.192874  | 3.484625  | -1.667234 |
|           |                                                    | 5  | 6  | 0 | 0.675621  | 4.160432  | -2.957882 |
|           |                                                    | 6  | 6  | 0 | 2.123677  | 4.635656  | -2.808476 |
|           |                                                    | 7  | 6  | 0 | 3.375594  | 1.486649  | -1.023312 |
|           |                                                    | 8  | 6  | 0 | 2.940932  | 0.492080  | -0.153180 |
|           |                                                    | 9  | 7  | 0 | 1.618225  | 0.504599  | 0.206488  |
|           |                                                    | 10 | 6  | 0 | 0.778277  | 1.492058  | -0.216286 |
|           |                                                    | 11 | 6  | 0 | -0.584358 | 1.474320  | 0.388502  |

|  |  |    |    |   |           |           |           |
|--|--|----|----|---|-----------|-----------|-----------|
|  |  | 12 | 6  | 0 | -0.980804 | 2.391058  | 1.362752  |
|  |  | 13 | 6  | 0 | -2.332893 | 2.394524  | 1.758960  |
|  |  | 14 | 6  | 0 | -3.213375 | 1.527604  | 1.118604  |
|  |  | 15 | 6  | 0 | -2.794311 | 0.578801  | 0.187446  |
|  |  | 16 | 7  | 0 | -1.459892 | 0.550699  | -0.099173 |
|  |  | 17 | 6  | 0 | 0.028963  | 3.342653  | 1.982106  |
|  |  | 18 | 6  | 0 | -0.455794 | 3.935320  | 3.312186  |
|  |  | 19 | 6  | 0 | -1.886598 | 4.464490  | 3.178017  |
|  |  | 20 | 6  | 0 | -2.843416 | 3.312844  | 2.849191  |
|  |  | 21 | 8  | 0 | -0.951853 | -0.392675 | -0.904596 |
|  |  | 22 | 8  | 0 | 1.101286  | -0.448148 | 0.942622  |
|  |  | 23 | 14 | 0 | -0.165716 | -2.054790 | -0.195603 |
|  |  | 24 | 17 | 0 | 1.220245  | -1.679564 | -1.942656 |
|  |  | 25 | 6  | 0 | 1.035141  | -3.365520 | 0.578494  |
|  |  | 26 | 1  | 0 | -2.994644 | 2.701590  | 3.750233  |
|  |  | 27 | 1  | 0 | -2.209158 | 4.958682  | 4.099931  |
|  |  | 28 | 1  | 0 | 0.228053  | 4.731508  | 3.623690  |
|  |  | 29 | 1  | 0 | 0.980790  | 2.822006  | 2.123623  |
|  |  | 30 | 6  | 0 | -3.754794 | -0.302564 | -0.504588 |
|  |  | 31 | 1  | 0 | -4.272558 | 1.569019  | 1.345271  |
|  |  | 32 | 6  | 0 | 3.855904  | -0.530665 | 0.393912  |
|  |  | 33 | 1  | 0 | 4.425931  | 1.487147  | -1.293947 |
|  |  | 34 | 1  | 0 | -0.775764 | 3.003075  | -1.834033 |
|  |  | 35 | 1  | 0 | 0.011869  | 4.997372  | -3.198391 |
|  |  | 36 | 1  | 0 | 2.445753  | 5.190703  | -3.695457 |
|  |  | 37 | 1  | 0 | 3.178765  | 2.897573  | -3.534551 |
|  |  | 38 | 1  | 0 | 0.231919  | 4.164348  | 1.281869  |
|  |  | 39 | 1  | 0 | -0.422655 | 3.164916  | 4.093022  |
|  |  | 40 | 1  | 0 | -1.925037 | 5.221178  | 2.383123  |
|  |  | 41 | 1  | 0 | -3.834616 | 3.689030  | 2.571781  |
|  |  | 42 | 1  | 0 | 0.021343  | 4.258883  | -0.906580 |
|  |  | 43 | 1  | 0 | 0.607875  | 3.450947  | -3.792229 |
|  |  | 44 | 1  | 0 | 2.195674  | 5.328180  | -1.958955 |
|  |  | 45 | 1  | 0 | 4.053420  | 3.765401  | -2.288828 |
|  |  | 46 | 6  | 0 | 3.843313  | -0.881438 | 1.753982  |
|  |  | 47 | 6  | 0 | 4.787139  | -1.774868 | 2.253853  |
|  |  | 48 | 6  | 0 | 5.743253  | -2.339796 | 1.407064  |
|  |  | 49 | 6  | 0 | 5.751309  | -2.008264 | 0.051992  |
|  |  | 50 | 6  | 0 | 4.815857  | -1.107180 | -0.451943 |
|  |  | 51 | 1  | 0 | 3.086778  | -0.465003 | 2.407416  |
|  |  | 52 | 1  | 0 | 4.769463  | -2.037782 | 3.307099  |
|  |  | 53 | 1  | 0 | 6.469617  | -3.045027 | 1.799828  |
|  |  | 54 | 1  | 0 | 6.476805  | -2.460386 | -0.617280 |
|  |  | 55 | 1  | 0 | 4.800768  | -0.878160 | -1.512476 |
|  |  | 56 | 6  | 0 | -3.684903 | -0.518973 | -1.889637 |
|  |  | 57 | 6  | 0 | -4.681671 | -1.248898 | -2.530429 |
|  |  | 58 | 6  | 0 | -5.743102 | -1.786275 | -1.801016 |
|  |  | 59 | 6  | 0 | -5.807408 | -1.591729 | -0.420381 |
|  |  | 60 | 6  | 0 | -4.822753 | -0.849284 | 0.224646  |
|  |  | 61 | 1  | 0 | -2.846727 | -0.131594 | -2.454963 |

|           |                                                                                                                                                                                                                                                                       |    |    |   |           |           |           |
|-----------|-----------------------------------------------------------------------------------------------------------------------------------------------------------------------------------------------------------------------------------------------------------------------|----|----|---|-----------|-----------|-----------|
|           |                                                                                                                                                                                                                                                                       | 62 | 1  | 0 | -4.618092 | -1.412087 | -3.601556 |
|           |                                                                                                                                                                                                                                                                       | 63 | 1  | 0 | -6.509939 | -2.367283 | -2.304610 |
|           |                                                                                                                                                                                                                                                                       | 64 | 1  | 0 | -6.616742 | -2.028083 | 0.156683  |
|           |                                                                                                                                                                                                                                                                       | 65 | 1  | 0 | -4.855235 | -0.727163 | 1.302314  |
|           |                                                                                                                                                                                                                                                                       | 66 | 17 | 0 | -1.556120 | -3.276583 | -1.272808 |
|           |                                                                                                                                                                                                                                                                       | 67 | 17 | 0 | -1.396901 | -1.795535 | 1.668770  |
|           |                                                                                                                                                                                                                                                                       | 68 | 1  | 0 | 1.554223  | -3.804554 | -0.277630 |
|           |                                                                                                                                                                                                                                                                       | 69 | 1  | 0 | 1.766778  | -2.789068 | 1.152193  |
|           |                                                                                                                                                                                                                                                                       | 70 | 6  | 0 | 0.429401  | -4.439218 | 1.424786  |
|           |                                                                                                                                                                                                                                                                       | 71 | 6  | 0 | 0.349619  | -5.726714 | 1.078217  |
|           |                                                                                                                                                                                                                                                                       | 72 | 1  | 0 | 0.034114  | -4.129660 | 2.389653  |
|           |                                                                                                                                                                                                                                                                       | 73 | 1  | 0 | -0.096734 | -6.466906 | 1.736545  |
|           |                                                                                                                                                                                                                                                                       | 74 | 1  | 0 | 0.715315  | -6.083525 | 0.118328  |
| <b>2e</b> | <p><math>E_{\text{tot}}</math>: -3207.5063907<br/>                     ZPE: 0.592552<br/>                     ACN: -3207.552188<br/>                     DCM: -3207.544883<br/>                     PhCl: -3207.539045<br/>                     TOL: -3207.524551</p> | 1  | 6  | 0 | -3.239479 | 2.716772  | 3.044157  |
|           |                                                                                                                                                                                                                                                                       | 2  | 6  | 0 | -2.656330 | 1.897292  | 1.912252  |
|           |                                                                                                                                                                                                                                                                       | 3  | 6  | 0 | -1.340713 | 2.088510  | 1.453527  |
|           |                                                                                                                                                                                                                                                                       | 4  | 6  | 0 | -0.452318 | 3.178256  | 2.031843  |
|           |                                                                                                                                                                                                                                                                       | 5  | 6  | 0 | -0.947206 | 3.680049  | 3.395219  |
|           |                                                                                                                                                                                                                                                                       | 6  | 6  | 0 | -2.445258 | 3.992574  | 3.345103  |
|           |                                                                                                                                                                                                                                                                       | 7  | 6  | 0 | -3.426897 | 0.916035  | 1.292659  |
|           |                                                                                                                                                                                                                                                                       | 8  | 6  | 0 | -2.917204 | 0.043424  | 0.334931  |
|           |                                                                                                                                                                                                                                                                       | 9  | 7  | 0 | -1.596509 | 0.183452  | 0.001102  |
|           |                                                                                                                                                                                                                                                                       | 10 | 6  | 0 | -0.861852 | 1.240572  | 0.451562  |
|           |                                                                                                                                                                                                                                                                       | 11 | 6  | 0 | 0.430640  | 1.512896  | -0.237412 |
|           |                                                                                                                                                                                                                                                                       | 12 | 6  | 0 | 0.587727  | 2.559797  | -1.147745 |
|           |                                                                                                                                                                                                                                                                       | 13 | 6  | 0 | 1.885034  | 2.832091  | -1.621610 |
|           |                                                                                                                                                                                                                                                                       | 14 | 6  | 0 | 2.943175  | 2.074843  | -1.122770 |
|           |                                                                                                                                                                                                                                                                       | 15 | 6  | 0 | 2.757640  | 0.994300  | -0.265415 |
|           |                                                                                                                                                                                                                                                                       | 16 | 7  | 0 | 1.474707  | 0.716834  | 0.113413  |
|           |                                                                                                                                                                                                                                                                       | 17 | 6  | 0 | -0.613210 | 3.361851  | -1.619343 |
|           |                                                                                                                                                                                                                                                                       | 18 | 6  | 0 | -0.336815 | 4.126287  | -2.921026 |
|           |                                                                                                                                                                                                                                                                       | 19 | 6  | 0 | 0.986897  | 4.890463  | -2.827680 |
|           |                                                                                                                                                                                                                                                                       | 20 | 6  | 0 | 2.150768  | 3.907917  | -2.653900 |
|           |                                                                                                                                                                                                                                                                       | 21 | 8  | 0 | 1.185083  | -0.370979 | 0.815236  |
|           |                                                                                                                                                                                                                                                                       | 22 | 8  | 0 | -1.011111 | -0.662819 | -0.841295 |
|           |                                                                                                                                                                                                                                                                       | 23 | 14 | 0 | 0.377584  | -2.029409 | -0.204814 |
|           |                                                                                                                                                                                                                                                                       | 24 | 17 | 0 | -0.807326 | -2.159505 | 1.711431  |
|           |                                                                                                                                                                                                                                                                       | 25 | 17 | 0 | -0.732076 | -3.552541 | -1.277242 |
|           |                                                                                                                                                                                                                                                                       | 26 | 1  | 0 | 2.345099  | 3.405912  | -3.612192 |
|           |                                                                                                                                                                                                                                                                       | 27 | 1  | 0 | 1.150463  | 5.499386  | -3.722471 |
|           |                                                                                                                                                                                                                                                                       | 28 | 1  | 0 | -1.168661 | 4.808944  | -3.122634 |
|           |                                                                                                                                                                                                                                                                       | 29 | 1  | 0 | -1.470282 | 2.694111  | -1.748530 |
|           |                                                                                                                                                                                                                                                                       | 30 | 6  | 0 | 3.887566  | 0.195508  | 0.250082  |
|           |                                                                                                                                                                                                                                                                       | 31 | 1  | 0 | 3.959969  | 2.308012  | -1.418990 |
|           |                                                                                                                                                                                                                                                                       | 32 | 6  | 0 | -3.819315 | -0.897641 | -0.375332 |
|           |                                                                                                                                                                                                                                                                       | 33 | 1  | 0 | -4.464346 | 0.780560  | 1.577518  |
|           |                                                                                                                                                                                                                                                                       | 34 | 1  | 0 | 0.574240  | 2.809142  | 2.115675  |
|           |                                                                                                                                                                                                                                                                       | 35 | 1  | 0 | -0.372639 | 4.566224  | 3.683832  |
|           |                                                                                                                                                                                                                                                                       | 36 | 1  | 0 | -2.786218 | 4.423890  | 4.291640  |
|           |                                                                                                                                                                                                                                                                       | 37 | 1  | 0 | -3.255177 | 2.080420  | 3.940412  |

|           |                                                                                                                                        |    |    |   |           |           |           |
|-----------|----------------------------------------------------------------------------------------------------------------------------------------|----|----|---|-----------|-----------|-----------|
|           |                                                                                                                                        | 38 | 1  | 0 | -0.899410 | 4.081509  | -0.839887 |
|           |                                                                                                                                        | 39 | 1  | 0 | -0.294527 | 3.420357  | -3.759879 |
|           |                                                                                                                                        | 40 | 1  | 0 | 0.951481  | 5.582993  | -1.975970 |
|           |                                                                                                                                        | 41 | 1  | 0 | 3.076693  | 4.435822  | -2.398110 |
|           |                                                                                                                                        | 42 | 1  | 0 | -0.415388 | 4.026809  | 1.334912  |
|           |                                                                                                                                        | 43 | 1  | 0 | -0.757878 | 2.916109  | 4.159966  |
|           |                                                                                                                                        | 44 | 1  | 0 | -2.636835 | 4.744473  | 2.567859  |
|           |                                                                                                                                        | 45 | 1  | 0 | -4.287713 | 2.947597  | 2.822657  |
|           |                                                                                                                                        | 46 | 6  | 0 | -4.919212 | -0.326682 | -1.041443 |
|           |                                                                                                                                        | 47 | 6  | 0 | -5.847607 | -1.135194 | -1.692304 |
|           |                                                                                                                                        | 48 | 6  | 0 | -5.694593 | -2.522736 | -1.672130 |
|           |                                                                                                                                        | 49 | 6  | 0 | -4.612982 | -3.091747 | -1.000537 |
|           |                                                                                                                                        | 50 | 6  | 0 | -3.674912 | -2.289220 | -0.352130 |
|           |                                                                                                                                        | 51 | 1  | 0 | -5.032768 | 0.753667  | -1.064495 |
|           |                                                                                                                                        | 52 | 1  | 0 | -6.684466 | -0.682078 | -2.215416 |
|           |                                                                                                                                        | 53 | 1  | 0 | -6.416733 | -3.156502 | -2.178702 |
|           |                                                                                                                                        | 54 | 1  | 0 | -4.486234 | -4.169381 | -0.980684 |
|           |                                                                                                                                        | 55 | 1  | 0 | -2.845916 | -2.738082 | 0.175540  |
|           |                                                                                                                                        | 56 | 6  | 0 | 3.981102  | -0.148704 | 1.608639  |
|           |                                                                                                                                        | 57 | 6  | 0 | 5.107872  | -0.814587 | 2.083469  |
|           |                                                                                                                                        | 58 | 6  | 0 | 6.144798  | -1.156515 | 1.212659  |
|           |                                                                                                                                        | 59 | 6  | 0 | 6.051347  | -0.829848 | -0.140516 |
|           |                                                                                                                                        | 60 | 6  | 0 | 4.931320  | -0.154151 | -0.620001 |
|           |                                                                                                                                        | 61 | 1  | 0 | 3.167191  | 0.092668  | 2.281506  |
|           |                                                                                                                                        | 62 | 1  | 0 | 5.171423  | -1.075779 | 3.135246  |
|           |                                                                                                                                        | 63 | 1  | 0 | 7.015924  | -1.686377 | 1.586007  |
|           |                                                                                                                                        | 64 | 1  | 0 | 6.843586  | -1.111677 | -0.827063 |
|           |                                                                                                                                        | 65 | 1  | 0 | 4.844000  | 0.068586  | -1.678332 |
|           |                                                                                                                                        | 66 | 6  | 0 | 1.880179  | -3.115713 | 0.367887  |
|           |                                                                                                                                        | 67 | 17 | 0 | 1.449626  | -1.310995 | -2.056690 |
|           |                                                                                                                                        | 68 | 6  | 0 | 1.621580  | -4.215468 | 1.346799  |
|           |                                                                                                                                        | 69 | 1  | 0 | 2.279248  | -3.525890 | -0.564178 |
|           |                                                                                                                                        | 70 | 1  | 0 | 2.621922  | -2.417779 | 0.766604  |
|           |                                                                                                                                        | 71 | 6  | 0 | 1.665070  | -5.519528 | 1.061479  |
|           |                                                                                                                                        | 72 | 1  | 0 | 1.382999  | -3.910559 | 2.363756  |
|           |                                                                                                                                        | 73 | 1  | 0 | 1.470535  | -6.274859 | 1.817960  |
|           |                                                                                                                                        | 74 | 1  | 0 | 1.880396  | -5.876660 | 0.057384  |
| <b>2f</b> | $E_{\text{tot}}$ : -3207.5368226<br>ZPE: 0.591594<br>ACN: -3207.556378<br>DCM: -3207.553027<br>PhCl: -3207.549759<br>TOL: -3207.544234 | 1  | 6  | 0 | 1.888983  | 5.116684  | -1.624009 |
|           |                                                                                                                                        | 2  | 6  | 0 | 1.743447  | 3.725550  | -1.041743 |
|           |                                                                                                                                        | 3  | 6  | 0 | 0.527786  | 3.261511  | -0.519222 |
|           |                                                                                                                                        | 4  | 6  | 0 | -0.720430 | 4.123777  | -0.520235 |
|           |                                                                                                                                        | 5  | 6  | 0 | -0.585348 | 5.398278  | -1.367279 |
|           |                                                                                                                                        | 6  | 6  | 0 | 0.777144  | 6.065628  | -1.164453 |
|           |                                                                                                                                        | 7  | 6  | 0 | 2.836016  | 2.859563  | -1.010956 |
|           |                                                                                                                                        | 8  | 6  | 0 | 2.773143  | 1.578268  | -0.477876 |
|           |                                                                                                                                        | 9  | 7  | 0 | 1.575408  | 1.156336  | 0.069925  |
|           |                                                                                                                                        | 10 | 6  | 0 | 0.471059  | 1.977834  | 0.037586  |
|           |                                                                                                                                        | 11 | 6  | 0 | -0.762573 | 1.422704  | 0.662224  |
|           |                                                                                                                                        | 12 | 6  | 0 | -0.926763 | 1.292600  | 2.045476  |
|           |                                                                                                                                        | 13 | 6  | 0 | -2.146109 | 0.809744  | 2.542378  |

|  |  |    |    |   |           |           |           |
|--|--|----|----|---|-----------|-----------|-----------|
|  |  | 14 | 6  | 0 | -3.126324 | 0.451174  | 1.617548  |
|  |  | 15 | 6  | 0 | -2.953365 | 0.557812  | 0.242929  |
|  |  | 16 | 7  | 0 | -1.757613 | 1.074729  | -0.226286 |
|  |  | 17 | 6  | 0 | 0.203659  | 1.702501  | 2.971529  |
|  |  | 18 | 6  | 0 | -0.009214 | 1.259750  | 4.426491  |
|  |  | 19 | 6  | 0 | -1.450508 | 1.504604  | 4.880122  |
|  |  | 20 | 6  | 0 | -2.409301 | 0.666772  | 4.027703  |
|  |  | 21 | 8  | 0 | -1.561901 | 1.243663  | -1.488068 |
|  |  | 22 | 8  | 0 | 1.483618  | -0.005595 | 0.635004  |
|  |  | 23 | 6  | 0 | 1.867444  | -3.092515 | -0.358459 |
|  |  | 24 | 6  | 0 | 2.601907  | -3.853607 | 0.708566  |
|  |  | 25 | 6  | 0 | 3.482913  | -4.830845 | 0.488007  |
|  |  | 26 | 14 | 0 | 0.043885  | -3.504027 | -0.451879 |
|  |  | 27 | 17 | 0 | -0.925862 | -2.246989 | -1.765919 |
|  |  | 28 | 17 | 0 | -0.868307 | -3.340107 | 1.405210  |
|  |  | 29 | 17 | 0 | -0.244847 | -5.454668 | -1.101216 |
|  |  | 30 | 1  | 0 | -2.302622 | -0.391974 | 4.305643  |
|  |  | 31 | 1  | 0 | -1.575089 | 1.252392  | 5.938749  |
|  |  | 32 | 1  | 0 | 0.700635  | 1.786626  | 5.073310  |
|  |  | 33 | 1  | 0 | 1.133031  | 1.270428  | 2.590554  |
|  |  | 34 | 6  | 0 | -4.005468 | 0.134589  | -0.709335 |
|  |  | 35 | 1  | 0 | -4.086346 | 0.090534  | 1.971799  |
|  |  | 36 | 6  | 0 | 3.948036  | 0.675732  | -0.488222 |
|  |  | 37 | 1  | 0 | 3.795512  | 3.194833  | -1.390818 |
|  |  | 38 | 1  | 0 | -1.548818 | 3.518924  | -0.899080 |
|  |  | 39 | 1  | 0 | -1.400076 | 6.086384  | -1.118036 |
|  |  | 40 | 1  | 0 | 0.837455  | 7.007440  | -1.720338 |
|  |  | 41 | 1  | 0 | 1.868207  | 5.046283  | -2.721434 |
|  |  | 42 | 1  | 0 | 0.315081  | 2.795411  | 2.932900  |
|  |  | 43 | 1  | 0 | 0.217296  | 0.189411  | 4.517336  |
|  |  | 44 | 1  | 0 | -1.694360 | 2.570534  | 4.775849  |
|  |  | 45 | 1  | 0 | -3.452285 | 0.930741  | 4.239237  |
|  |  | 46 | 1  | 0 | -0.964008 | 4.394305  | 0.516579  |
|  |  | 47 | 1  | 0 | -0.703688 | 5.143942  | -2.428653 |
|  |  | 48 | 1  | 0 | 0.914515  | 6.312580  | -0.103117 |
|  |  | 49 | 1  | 0 | 2.876835  | 5.516170  | -1.365831 |
|  |  | 50 | 1  | 0 | 2.285631  | -3.295379 | -1.351829 |
|  |  | 51 | 1  | 0 | 1.918652  | -2.008299 | -0.181795 |
|  |  | 52 | 1  | 0 | 2.371016  | -3.567372 | 1.733603  |
|  |  | 53 | 1  | 0 | 3.977037  | -5.343146 | 1.307787  |
|  |  | 54 | 1  | 0 | 3.743539  | -5.151452 | -0.517519 |
|  |  | 55 | 6  | 0 | 4.310183  | -0.119855 | 0.613011  |
|  |  | 56 | 6  | 0 | 5.470157  | -0.890154 | 0.573908  |
|  |  | 57 | 6  | 0 | 6.284114  | -0.891573 | -0.560527 |
|  |  | 58 | 6  | 0 | 5.929718  | -0.113817 | -1.662814 |
|  |  | 59 | 6  | 0 | 4.773082  | 0.662716  | -1.626332 |
|  |  | 60 | 1  | 0 | 3.672436  | -0.137325 | 1.486190  |
|  |  | 61 | 1  | 0 | 5.734991  | -1.498851 | 1.433163  |
|  |  | 62 | 1  | 0 | 7.182371  | -1.501367 | -0.587983 |
|  |  | 63 | 1  | 0 | 6.546642  | -0.117483 | -2.556570 |

|           |                                                                                                                                       |    |    |   |           |           |           |
|-----------|---------------------------------------------------------------------------------------------------------------------------------------|----|----|---|-----------|-----------|-----------|
|           |                                                                                                                                       | 64 | 1  | 0 | 4.491745  | 1.246553  | -2.497430 |
|           |                                                                                                                                       | 65 | 6  | 0 | -4.329269 | 0.864740  | -1.866326 |
|           |                                                                                                                                       | 66 | 6  | 0 | -5.388171 | 0.463728  | -2.677602 |
|           |                                                                                                                                       | 67 | 6  | 0 | -6.131947 | -0.675782 | -2.365589 |
|           |                                                                                                                                       | 68 | 6  | 0 | -5.808498 | -1.417833 | -1.229613 |
|           |                                                                                                                                       | 69 | 6  | 0 | -4.756567 | -1.015552 | -0.409419 |
|           |                                                                                                                                       | 70 | 1  | 0 | -3.740040 | 1.732832  | -2.127143 |
|           |                                                                                                                                       | 71 | 1  | 0 | -5.628813 | 1.043188  | -3.564270 |
|           |                                                                                                                                       | 72 | 1  | 0 | -6.949461 | -0.988666 | -3.008623 |
|           |                                                                                                                                       | 73 | 1  | 0 | -6.366133 | -2.317214 | -0.985643 |
|           |                                                                                                                                       | 74 | 1  | 0 | -4.493919 | -1.614951 | 0.456690  |
| <b>2g</b> | $E_{\text{tot}}$ : -3207.539969<br>ZPE: 0.591471<br>ACN: -3207.558376<br>DCM: -3207.555235<br>PhCl: -3207.552287<br>TOL: -3207.547039 | 1  | 6  | 0 | 3.480471  | -1.899475 | -1.920070 |
|           |                                                                                                                                       | 2  | 6  | 0 | 3.392151  | -1.676375 | -0.534693 |
|           |                                                                                                                                       | 3  | 6  | 0 | 4.543281  | -1.255660 | 0.153923  |
|           |                                                                                                                                       | 4  | 6  | 0 | 5.750840  | -1.073397 | -0.517013 |
|           |                                                                                                                                       | 5  | 6  | 0 | 5.830942  | -1.312958 | -1.888657 |
|           |                                                                                                                                       | 6  | 6  | 0 | 4.692632  | -1.726239 | -2.583591 |
|           |                                                                                                                                       | 7  | 6  | 0 | 2.156334  | -1.927001 | 0.242190  |
|           |                                                                                                                                       | 8  | 6  | 0 | 2.187900  | -2.523141 | 1.497205  |
|           |                                                                                                                                       | 9  | 6  | 0 | 1.045953  | -2.739106 | 2.267996  |
|           |                                                                                                                                       | 10 | 6  | 0 | -0.186551 | -2.326991 | 1.740340  |
|           |                                                                                                                                       | 11 | 6  | 0 | -0.219126 | -1.754241 | 0.464471  |
|           |                                                                                                                                       | 12 | 7  | 0 | 0.926477  | -1.560455 | -0.273103 |
|           |                                                                                                                                       | 13 | 6  | 0 | 1.156758  | -3.393655 | 3.629863  |
|           |                                                                                                                                       | 14 | 6  | 0 | -0.179650 | -3.958295 | 4.123277  |
|           |                                                                                                                                       | 15 | 6  | 0 | -1.273355 | -2.896841 | 3.978251  |
|           |                                                                                                                                       | 16 | 6  | 0 | -1.483233 | -2.503952 | 2.508334  |
|           |                                                                                                                                       | 17 | 6  | 0 | -1.483555 | -1.343136 | -0.208866 |
|           |                                                                                                                                       | 18 | 6  | 0 | -2.068619 | -2.081699 | -1.243431 |
|           |                                                                                                                                       | 19 | 6  | 0 | -3.291290 | -1.650442 | -1.778727 |
|           |                                                                                                                                       | 20 | 6  | 0 | -3.842470 | -0.473139 | -1.273473 |
|           |                                                                                                                                       | 21 | 6  | 0 | -3.243045 | 0.275875  | -0.268358 |
|           |                                                                                                                                       | 22 | 7  | 0 | -2.062056 | -0.193330 | 0.277492  |
|           |                                                                                                                                       | 23 | 6  | 0 | -1.374841 | -3.334410 | -1.745823 |
|           |                                                                                                                                       | 24 | 6  | 0 | -1.984131 | -3.890244 | -3.040963 |
|           |                                                                                                                                       | 25 | 6  | 0 | -3.513993 | -3.865600 | -2.994343 |
|           |                                                                                                                                       | 26 | 6  | 0 | -4.004475 | -2.418751 | -2.872922 |
|           |                                                                                                                                       | 27 | 6  | 0 | -3.831155 | 1.546656  | 0.214098  |
|           |                                                                                                                                       | 28 | 6  | 0 | -3.877909 | 1.898811  | 1.574424  |
|           |                                                                                                                                       | 29 | 6  | 0 | -4.518221 | 3.068877  | 1.975672  |
|           |                                                                                                                                       | 30 | 6  | 0 | -5.107330 | 3.916075  | 1.035107  |
|           |                                                                                                                                       | 31 | 6  | 0 | -5.053080 | 3.584654  | -0.318762 |
|           |                                                                                                                                       | 32 | 6  | 0 | -4.422021 | 2.410412  | -0.724706 |
|           |                                                                                                                                       | 33 | 8  | 0 | -1.489099 | 0.438893  | 1.250555  |
|           |                                                                                                                                       | 34 | 14 | 0 | 2.017589  | 3.058237  | 0.179329  |
|           |                                                                                                                                       | 35 | 17 | 0 | 1.493908  | 4.943838  | 0.871179  |
|           |                                                                                                                                       | 36 | 8  | 0 | 0.834826  | -1.039980 | -1.454704 |
|           |                                                                                                                                       | 37 | 17 | 0 | 2.679619  | 1.966562  | 1.817435  |
|           |                                                                                                                                       | 38 | 17 | 0 | 3.631233  | 3.292117  | -1.098046 |
|           |                                                                                                                                       | 39 | 6  | 0 | 0.576061  | 2.206571  | -0.647463 |

|  |  |    |   |   |           |           |           |
|--|--|----|---|---|-----------|-----------|-----------|
|  |  | 40 | 1 | 0 | 1.517770  | -2.647206 | 4.352411  |
|  |  | 41 | 1 | 0 | -0.085293 | -4.281433 | 5.165530  |
|  |  | 42 | 1 | 0 | -2.221186 | -3.250607 | 4.397743  |
|  |  | 43 | 1 | 0 | -2.040479 | -1.564456 | 2.455873  |
|  |  | 44 | 1 | 0 | 3.153691  | -2.847475 | 1.870418  |
|  |  | 45 | 1 | 0 | -4.794909 | -0.121860 | -1.656648 |
|  |  | 46 | 1 | 0 | -0.319994 | -3.097011 | -1.909589 |
|  |  | 47 | 1 | 0 | -1.613231 | -4.906982 | -3.208575 |
|  |  | 48 | 1 | 0 | -3.939528 | -4.328789 | -3.890988 |
|  |  | 49 | 1 | 0 | -3.841924 | -1.904199 | -3.831313 |
|  |  | 50 | 1 | 0 | -2.091813 | -3.269044 | 2.006098  |
|  |  | 51 | 1 | 0 | -0.987072 | -2.007746 | 4.554903  |
|  |  | 52 | 1 | 0 | -0.447151 | -4.848008 | 3.537299  |
|  |  | 53 | 1 | 0 | 1.924000  | -4.176059 | 3.595487  |
|  |  | 54 | 1 | 0 | -1.414681 | -4.102271 | -0.960680 |
|  |  | 55 | 1 | 0 | -1.642223 | -3.287375 | -3.892313 |
|  |  | 56 | 1 | 0 | -3.867310 | -4.451724 | -2.135289 |
|  |  | 57 | 1 | 0 | -5.085638 | -2.386157 | -2.693270 |
|  |  | 58 | 1 | 0 | 2.595609  | -2.194809 | -2.466834 |
|  |  | 59 | 1 | 0 | 4.745679  | -1.908476 | -3.653005 |
|  |  | 60 | 1 | 0 | 6.769924  | -1.167758 | -2.414719 |
|  |  | 61 | 1 | 0 | 6.623643  | -0.732148 | 0.031409  |
|  |  | 62 | 1 | 0 | 4.482384  | -1.039107 | 1.215679  |
|  |  | 63 | 1 | 0 | -3.401804 | 1.258677  | 2.304189  |
|  |  | 64 | 1 | 0 | -4.550953 | 3.323090  | 3.031048  |
|  |  | 65 | 1 | 0 | -5.596107 | 4.831805  | 1.354518  |
|  |  | 66 | 1 | 0 | -5.492875 | 4.243166  | -1.061917 |
|  |  | 67 | 1 | 0 | -4.362317 | 2.172121  | -1.782175 |
|  |  | 68 | 1 | 0 | -0.114247 | 1.907470  | 0.156017  |
|  |  | 69 | 6 | 0 | -0.115258 | 3.062414  | -1.673558 |
|  |  | 70 | 1 | 0 | 0.953826  | 1.276513  | -1.093259 |
|  |  | 71 | 6 | 0 | -0.047848 | 2.867285  | -2.991888 |
|  |  | 72 | 1 | 0 | -0.706663 | 3.892002  | -1.288058 |
|  |  | 73 | 1 | 0 | -0.570430 | 3.518057  | -3.686677 |
|  |  | 74 | 1 | 0 | 0.524346  | 2.047578  | -3.418190 |

Three most stable arrangements found for the complex  $[1 \cdot \text{SiCl}_2(\text{C}_3\text{H}_5)]^+$

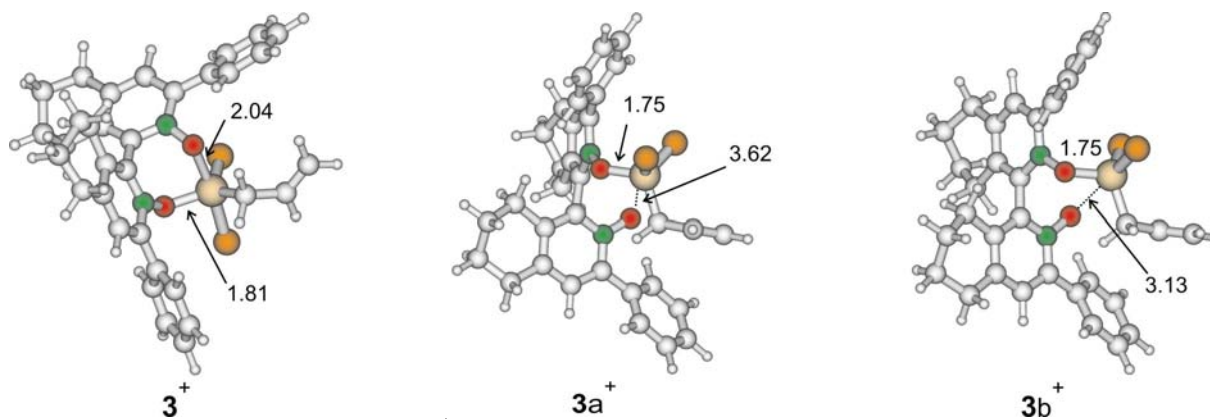

Note that the considered isomer  $3^+$  is the most stable form in all solvents.



| Isomer               | Total energy/Hartree<br>ZPE/Hartree<br>PCM energy/Hartree | Geometry         |                  |                |                                  |           |           |
|----------------------|-----------------------------------------------------------|------------------|------------------|----------------|----------------------------------|-----------|-----------|
|                      |                                                           | Center<br>Number | Atomic<br>Number | Atomic<br>Type | Coordinates (Angstroms)<br>X Y Z |           |           |
| <b>3<sup>+</sup></b> | $E_{\text{tot}}$ : -2747.1220737                          | 1                | 6                | 0              | -2.476908                        | 3.573501  | 2.783809  |
|                      | ZPE: 0.592579                                             | 2                | 6                | 0              | -2.104606                        | 2.567581  | 1.715311  |
|                      | ACN: -2747.192199                                         | 3                | 6                | 0              | -0.789548                        | 2.468479  | 1.203756  |
|                      | DCM: -2747.184117                                         | 4                | 6                | 0              | 0.315257                         | 3.379025  | 1.714513  |
|                      | PhCl: -2747.177566                                        | 5                | 6                | 0              | -0.025490                        | 4.028890  | 3.062597  |
|                      | TOL: -2747.158998                                         | 6                | 6                | 0              | -1.419450                        | 4.658009  | 3.013256  |
|                      |                                                           | 7                | 6                | 0              | -3.076791                        | 1.700319  | 1.226636  |
|                      |                                                           | 8                | 6                | 0              | -2.803473                        | 0.699607  | 0.293167  |
|                      |                                                           | 9                | 7                | 0              | -1.509278                        | 0.615778  | -0.134666 |
|                      |                                                           | 10               | 6                | 0              | -0.531557                        | 1.489036  | 0.242015  |
|                      |                                                           | 11               | 6                | 0              | 0.824630                         | 1.301570  | -0.345484 |
|                      |                                                           | 12               | 6                | 0              | 1.439992                         | 2.197464  | -1.214066 |
|                      |                                                           | 13               | 6                | 0              | 2.808066                         | 1.985084  | -1.507488 |
|                      |                                                           | 14               | 6                | 0              | 3.472150                         | 0.945809  | -0.861531 |
|                      |                                                           | 15               | 6                | 0              | 2.823997                         | 0.017826  | -0.040988 |
|                      |                                                           | 16               | 7                | 0              | 1.481247                         | 0.198060  | 0.122668  |
|                      |                                                           | 17               | 6                | 0              | 0.667724                         | 3.348901  | -1.834179 |
|                      |                                                           | 18               | 6                | 0              | 1.344560                         | 3.894140  | -3.100089 |
|                      |                                                           | 19               | 6                | 0              | 2.828428                         | 4.164946  | -2.836828 |
|                      |                                                           | 20               | 6                | 0              | 3.555123                         | 2.859697  | -2.491508 |
|                      |                                                           | 21               | 8                | 0              | 0.717794                         | -0.735095 | 0.723257  |
|                      |                                                           | 22               | 14               | 0              | -0.413877                        | -1.911373 | -0.492720 |
|                      |                                                           | 23               | 6                | 0              | -0.896276                        | -2.771787 | 1.131746  |
|                      |                                                           | 24               | 6                | 0              | -0.510866                        | -4.228300 | 1.125336  |
|                      |                                                           | 25               | 6                | 0              | 0.446738                         | -4.754396 | 1.890462  |
|                      |                                                           | 26               | 8                | 0              | -1.179156                        | -0.361788 | -1.028917 |
|                      |                                                           | 27               | 17               | 0              | -1.747836                        | -2.983144 | -1.800073 |
|                      |                                                           | 28               | 17               | 0              | 1.305312                         | -2.317126 | -1.620255 |
|                      |                                                           | 29               | 1                | 0              | 3.694304                         | 2.269105  | -3.408191 |
|                      |                                                           | 30               | 1                | 0              | 3.300600                         | 4.623992  | -3.710002 |
|                      |                                                           | 31               | 1                | 0              | 0.831086                         | 4.807500  | -3.414321 |
|                      |                                                           | 32               | 1                | 0              | -0.356442                        | 3.030600  | -2.053212 |
|                      |                                                           | 33               | 6                | 0              | 3.541965                         | -1.071026 | 0.645993  |
|                      |                                                           | 34               | 1                | 0              | 4.540730                         | 0.825300  | -0.999044 |
|                      |                                                           | 35               | 6                | 0              | -3.860467                        | -0.197470 | -0.208755 |
|                      |                                                           | 36               | 1                | 0              | -4.103104                        | 1.794712  | 1.562299  |
|                      |                                                           | 37               | 1                | 0              | 1.252286                         | 2.818995  | 1.785885  |
|                      |                                                           | 38               | 1                | 0              | 0.734483                         | 4.779635  | 3.297514  |
|                      |                                                           | 39               | 1                | 0              | -1.641397                        | 5.191852  | 3.941463  |
|                      |                                                           | 40               | 1                | 0              | -2.632661                        | 3.011992  | 3.715984  |
|                      |                                                           | 41               | 1                | 0              | 0.587938                         | 4.165499  | -1.104743 |
|                      |                                                           | 42               | 1                | 0              | 1.237416                         | 3.172161  | -3.919134 |
|                      |                                                           | 43               | 1                | 0              | 2.930994                         | 4.880915  | -2.011126 |
|                      |                                                           | 44               | 1                | 0              | 4.562201                         | 3.056361  | -2.107748 |
|                      |                                                           | 45               | 1                | 0              | 0.489800                         | 4.175287  | 0.979988  |

|                       |                                                                                                                                                                                |    |    |   |           |           |           |
|-----------------------|--------------------------------------------------------------------------------------------------------------------------------------------------------------------------------|----|----|---|-----------|-----------|-----------|
|                       |                                                                                                                                                                                | 46 | 1  | 0 | 0.014700  | 3.276967  | 3.860774  |
|                       |                                                                                                                                                                                | 47 | 1  | 0 | -1.461275 | 5.399644  | 2.205562  |
|                       |                                                                                                                                                                                | 48 | 1  | 0 | -3.449811 | 4.012216  | 2.535755  |
|                       |                                                                                                                                                                                | 49 | 1  | 0 | -0.442082 | -2.255333 | 1.979383  |
|                       |                                                                                                                                                                                | 50 | 1  | 0 | -1.987891 | -2.672934 | 1.200102  |
|                       |                                                                                                                                                                                | 51 | 1  | 0 | -1.059336 | -4.865027 | 0.435338  |
|                       |                                                                                                                                                                                | 52 | 1  | 0 | 0.686020  | -5.811967 | 1.846375  |
|                       |                                                                                                                                                                                | 53 | 1  | 0 | 1.023422  | -4.150291 | 2.586301  |
|                       |                                                                                                                                                                                | 54 | 6  | 0 | 3.251805  | -1.411979 | 1.978443  |
|                       |                                                                                                                                                                                | 55 | 6  | 0 | 4.015824  | -2.372735 | 2.634551  |
|                       |                                                                                                                                                                                | 56 | 6  | 0 | 5.062257  | -3.016283 | 1.970041  |
|                       |                                                                                                                                                                                | 57 | 6  | 0 | 5.349192  | -2.690673 | 0.643474  |
|                       |                                                                                                                                                                                | 58 | 6  | 0 | 4.599684  | -1.719415 | -0.014001 |
|                       |                                                                                                                                                                                | 59 | 1  | 0 | 2.437337  | -0.921021 | 2.496690  |
|                       |                                                                                                                                                                                | 60 | 1  | 0 | 3.794508  | -2.619449 | 3.668101  |
|                       |                                                                                                                                                                                | 61 | 1  | 0 | 5.649230  | -3.771329 | 2.483286  |
|                       |                                                                                                                                                                                | 62 | 1  | 0 | 6.152329  | -3.196847 | 0.118016  |
|                       |                                                                                                                                                                                | 63 | 1  | 0 | 4.812789  | -1.489872 | -1.053139 |
|                       |                                                                                                                                                                                | 64 | 6  | 0 | -4.036293 | -0.443786 | -1.580980 |
|                       |                                                                                                                                                                                | 65 | 6  | 0 | -5.121919 | -1.197797 | -2.015130 |
|                       |                                                                                                                                                                                | 66 | 6  | 0 | -6.024888 | -1.731747 | -1.093969 |
|                       |                                                                                                                                                                                | 67 | 6  | 0 | -5.848937 | -1.502764 | 0.272234  |
|                       |                                                                                                                                                                                | 68 | 6  | 0 | -4.780044 | -0.729258 | 0.714625  |
|                       |                                                                                                                                                                                | 69 | 1  | 0 | -3.331354 | -0.047866 | -2.300955 |
|                       |                                                                                                                                                                                | 70 | 1  | 0 | -5.255496 | -1.378290 | -3.076408 |
|                       |                                                                                                                                                                                | 71 | 1  | 0 | -6.861956 | -2.329809 | -1.439775 |
|                       |                                                                                                                                                                                | 72 | 1  | 0 | -6.541971 | -1.925653 | 0.992038  |
|                       |                                                                                                                                                                                | 73 | 1  | 0 | -4.642360 | -0.557819 | 1.778053  |
| <b>3a<sup>+</sup></b> | <b>E<sub>tot</sub>: -2747.1243018</b><br><b>ZPE: 0.591785</b><br><b>ACN: -2747.186384</b><br><b>DCM: -2747.179121</b><br><b>PhCl: -2747.173339</b><br><b>TOL: -2747.156959</b> | 1  | 6  | 0 | 4.818130  | -0.496360 | -1.000529 |
|                       |                                                                                                                                                                                | 2  | 6  | 0 | 3.864973  | -0.083506 | -0.053530 |
|                       |                                                                                                                                                                                | 3  | 6  | 0 | 4.091934  | -0.334836 | 1.310618  |
|                       |                                                                                                                                                                                | 4  | 6  | 0 | 5.255193  | -0.984388 | 1.713597  |
|                       |                                                                                                                                                                                | 5  | 6  | 0 | 6.193703  | -1.400285 | 0.766976  |
|                       |                                                                                                                                                                                | 6  | 6  | 0 | 5.971440  | -1.159032 | -0.590140 |
|                       |                                                                                                                                                                                | 7  | 6  | 0 | 2.709881  | 0.717462  | -0.505967 |
|                       |                                                                                                                                                                                | 8  | 6  | 0 | 2.856968  | 1.790330  | -1.378714 |
|                       |                                                                                                                                                                                | 9  | 6  | 0 | 1.789313  | 2.601647  | -1.765637 |
|                       |                                                                                                                                                                                | 10 | 6  | 0 | 0.521062  | 2.368233  | -1.195375 |
|                       |                                                                                                                                                                                | 11 | 6  | 0 | 0.373616  | 1.306124  | -0.301705 |
|                       |                                                                                                                                                                                | 12 | 7  | 0 | 1.438915  | 0.486955  | -0.052255 |
|                       |                                                                                                                                                                                | 13 | 6  | 0 | -0.676970 | 3.240967  | -1.519198 |
|                       |                                                                                                                                                                                | 14 | 6  | 0 | -0.456013 | 4.138594  | -2.745746 |
|                       |                                                                                                                                                                                | 15 | 6  | 0 | 0.924242  | 4.798632  | -2.708897 |
|                       |                                                                                                                                                                                | 16 | 6  | 0 | 2.018194  | 3.725511  | -2.749549 |
|                       |                                                                                                                                                                                | 17 | 8  | 0 | 1.207045  | -0.603877 | 0.757006  |
|                       |                                                                                                                                                                                | 18 | 14 | 0 | 0.930733  | -2.211322 | 0.125998  |
|                       |                                                                                                                                                                                | 19 | 6  | 0 | -0.855375 | -2.723744 | 0.283518  |
|                       |                                                                                                                                                                                | 20 | 6  | 0 | -0.878448 | 1.096602  | 0.481610  |
|                       |                                                                                                                                                                                | 21 | 6  | 0 | -1.068830 | 1.608318  | 1.764932  |
|                       |                                                                                                                                                                                | 22 | 6  | 0 | -2.337431 | 1.445431  | 2.353293  |

|  |  |    |    |   |           |           |           |
|--|--|----|----|---|-----------|-----------|-----------|
|  |  | 23 | 6  | 0 | -3.317013 | 0.780388  | 1.616290  |
|  |  | 24 | 6  | 0 | -3.104243 | 0.249055  | 0.343629  |
|  |  | 25 | 7  | 0 | -1.853650 | 0.428771  | -0.210388 |
|  |  | 26 | 6  | 0 | -2.647494 | 1.969076  | 3.740916  |
|  |  | 27 | 6  | 0 | -1.645036 | 3.024297  | 4.222226  |
|  |  | 28 | 6  | 0 | -0.212328 | 2.545022  | 3.972960  |
|  |  | 29 | 6  | 0 | 0.048412  | 2.356990  | 2.471366  |
|  |  | 30 | 6  | 0 | -4.150524 | -0.491526 | -0.392140 |
|  |  | 31 | 6  | 0 | -4.328674 | -0.374125 | -1.782819 |
|  |  | 32 | 6  | 0 | -5.381429 | -1.034139 | -2.411686 |
|  |  | 33 | 6  | 0 | -6.259940 | -1.832027 | -1.676513 |
|  |  | 34 | 6  | 0 | -6.083362 | -1.967365 | -0.298763 |
|  |  | 35 | 6  | 0 | -5.040418 | -1.300868 | 0.338552  |
|  |  | 36 | 8  | 0 | -1.538261 | -0.033998 | -1.383205 |
|  |  | 37 | 17 | 0 | 1.592181  | -2.252366 | -1.816242 |
|  |  | 38 | 17 | 0 | 2.129062  | -3.354180 | 1.342121  |
|  |  | 39 | 1  | 0 | -2.641211 | 1.120217  | 4.439597  |
|  |  | 40 | 1  | 0 | -1.805257 | 3.226347  | 5.285350  |
|  |  | 41 | 1  | 0 | 0.514135  | 3.256057  | 4.377958  |
|  |  | 42 | 1  | 0 | 1.000545  | 1.836844  | 2.321572  |
|  |  | 43 | 1  | 0 | -4.311917 | 0.675139  | 2.034924  |
|  |  | 44 | 1  | 0 | 3.857676  | 2.003882  | -1.736237 |
|  |  | 45 | 1  | 0 | -1.542249 | 2.592931  | -1.682963 |
|  |  | 46 | 1  | 0 | -1.248162 | 4.891872  | -2.783274 |
|  |  | 47 | 1  | 0 | 1.052366  | 5.481075  | -3.553827 |
|  |  | 48 | 1  | 0 | 2.053283  | 3.278492  | -3.753784 |
|  |  | 49 | 1  | 0 | 0.161672  | 3.343349  | 1.998985  |
|  |  | 50 | 1  | 0 | -0.049437 | 1.594028  | 4.495991  |
|  |  | 51 | 1  | 0 | -1.815434 | 3.970356  | 3.691962  |
|  |  | 52 | 1  | 0 | -3.669125 | 2.364194  | 3.758168  |
|  |  | 53 | 1  | 0 | -0.905820 | 3.862500  | -0.642860 |
|  |  | 54 | 1  | 0 | -0.548996 | 3.538826  | -3.659672 |
|  |  | 55 | 1  | 0 | 1.027000  | 5.400783  | -1.797101 |
|  |  | 56 | 1  | 0 | 3.010433  | 4.157152  | -2.578871 |
|  |  | 57 | 1  | 0 | -3.641415 | 0.226861  | -2.362180 |
|  |  | 58 | 1  | 0 | -5.513296 | -0.926643 | -3.483801 |
|  |  | 59 | 1  | 0 | -7.073128 | -2.350282 | -2.175046 |
|  |  | 60 | 1  | 0 | -6.752664 | -2.596167 | 0.279686  |
|  |  | 61 | 1  | 0 | -4.901422 | -1.430328 | 1.407493  |
|  |  | 62 | 1  | 0 | 3.369232  | -0.013960 | 2.052098  |
|  |  | 63 | 1  | 0 | 5.428529  | -1.166247 | 2.769150  |
|  |  | 64 | 1  | 0 | 7.095451  | -1.912802 | 1.086407  |
|  |  | 65 | 1  | 0 | 6.693782  | -1.488928 | -1.329444 |
|  |  | 66 | 1  | 0 | 4.640700  | -0.322335 | -2.057037 |
|  |  | 67 | 6  | 0 | -1.026419 | -4.207939 | 0.072550  |
|  |  | 68 | 1  | 0 | -1.201157 | -2.418233 | 1.279849  |
|  |  | 69 | 1  | 0 | -1.406930 | -2.146094 | -0.466861 |
|  |  | 70 | 6  | 0 | -1.535216 | -4.750343 | -1.034543 |
|  |  | 71 | 1  | 0 | -0.695393 | -4.851759 | 0.884863  |
|  |  | 72 | 1  | 0 | -1.633340 | -5.825922 | -1.139426 |

|                       |                                  |    |    |   |           |           |           |
|-----------------------|----------------------------------|----|----|---|-----------|-----------|-----------|
|                       |                                  | 73 | 1  | 0 | -1.878363 | -4.141678 | -1.866957 |
| <b>3b<sup>+</sup></b> | E <sub>tot</sub> : -2747.1217365 | 1  | 6  | 0 | 4.762129  | -0.814500 | -0.693439 |
|                       | ZPE: 0.591898                    | 2  | 6  | 0 | 3.821529  | -0.233365 | 0.172882  |
|                       | ACN: -2747.18371                 | 3  | 6  | 0 | 3.992972  | -0.347189 | 1.563109  |
|                       | DCM: -2747.176269                | 4  | 6  | 0 | 5.093000  | -1.029844 | 2.072567  |
|                       | PhCl: -2747.170431               | 5  | 6  | 0 | 6.018862  | -1.616877 | 1.206942  |
|                       | TOL: -2747.154475                | 6  | 6  | 0 | 5.849687  | -1.512532 | -0.174767 |
|                       |                                  | 7  | 6  | 0 | 2.739215  | 0.597368  | -0.390175 |
|                       |                                  | 8  | 6  | 0 | 2.988539  | 1.598866  | -1.322994 |
|                       |                                  | 9  | 6  | 0 | 1.988726  | 2.440820  | -1.810284 |
|                       |                                  | 10 | 6  | 0 | 0.687472  | 2.321692  | -1.277111 |
|                       |                                  | 11 | 6  | 0 | 0.440921  | 1.329355  | -0.327433 |
|                       |                                  | 12 | 7  | 0 | 1.441394  | 0.466315  | 0.018981  |
|                       |                                  | 13 | 6  | 0 | -0.440481 | 3.238609  | -1.716702 |
|                       |                                  | 14 | 6  | 0 | -0.129333 | 3.986725  | -3.020734 |
|                       |                                  | 15 | 6  | 0 | 1.278836  | 4.585175  | -2.986277 |
|                       |                                  | 16 | 6  | 0 | 2.322107  | 3.468667  | -2.867564 |
|                       |                                  | 17 | 8  | 0 | 1.097882  | -0.575318 | 0.850840  |
|                       |                                  | 18 | 14 | 0 | 0.799424  | -2.192873 | 0.240830  |
|                       |                                  | 19 | 6  | 0 | -0.900567 | -2.792917 | 0.751910  |
|                       |                                  | 20 | 6  | 0 | -0.866216 | 1.235905  | 0.385151  |
|                       |                                  | 21 | 6  | 0 | -1.191588 | 2.008446  | 1.498150  |
|                       |                                  | 22 | 6  | 0 | -2.505770 | 1.915007  | 1.997120  |
|                       |                                  | 23 | 6  | 0 | -3.394331 | 1.065426  | 1.339264  |
|                       |                                  | 24 | 6  | 0 | -3.043261 | 0.271616  | 0.245905  |
|                       |                                  | 25 | 7  | 0 | -1.745764 | 0.372035  | -0.209936 |
|                       |                                  | 26 | 6  | 0 | -2.956521 | 2.700590  | 3.211688  |
|                       |                                  | 27 | 6  | 0 | -2.023029 | 3.867151  | 3.556760  |
|                       |                                  | 28 | 6  | 0 | -0.563581 | 3.403736  | 3.531308  |
|                       |                                  | 29 | 6  | 0 | -0.165388 | 2.937871  | 2.123259  |
|                       |                                  | 30 | 6  | 0 | -3.994243 | -0.653713 | -0.404974 |
|                       |                                  | 31 | 6  | 0 | -4.023200 | -0.847532 | -1.798276 |
|                       |                                  | 32 | 6  | 0 | -4.991763 | -1.668738 | -2.369976 |
|                       |                                  | 33 | 6  | 0 | -5.931939 | -2.320727 | -1.569491 |
|                       |                                  | 34 | 6  | 0 | -5.902825 | -2.146217 | -0.185290 |
|                       |                                  | 35 | 6  | 0 | -4.944563 | -1.317475 | 0.392483  |
|                       |                                  | 36 | 8  | 0 | -1.287996 | -0.350022 | -1.189278 |
|                       |                                  | 37 | 17 | 0 | 1.259851  | -2.223616 | -1.759373 |
|                       |                                  | 38 | 17 | 0 | 2.187231  | -3.358494 | 1.228469  |
|                       |                                  | 39 | 1  | 0 | -3.003602 | 2.011563  | 4.066975  |
|                       |                                  | 40 | 1  | 0 | -2.284204 | 4.268222  | 4.540406  |
|                       |                                  | 41 | 1  | 0 | 0.107540  | 4.207966  | 3.847744  |
|                       |                                  | 42 | 1  | 0 | 0.814380  | 2.448519  | 2.151431  |
|                       |                                  | 43 | 1  | 0 | -4.423333 | 1.012197  | 1.677874  |
|                       |                                  | 44 | 1  | 0 | 4.014226  | 1.725274  | -1.650266 |
|                       |                                  | 45 | 1  | 0 | -1.355770 | 2.650443  | -1.828653 |
|                       |                                  | 46 | 1  | 0 | -0.881011 | 4.766766  | -3.172278 |
|                       |                                  | 47 | 1  | 0 | 1.475455  | 5.171214  | -3.888407 |
|                       |                                  | 48 | 1  | 0 | 2.396508  | 2.934779  | -3.826118 |
|                       |                                  | 49 | 1  | 0 | -0.046403 | 3.818494  | 1.476029  |

|  |  |    |   |   |           |           |           |
|--|--|----|---|---|-----------|-----------|-----------|
|  |  | 50 | 1 | 0 | -0.428483 | 2.580169  | 4.243938  |
|  |  | 51 | 1 | 0 | -2.162644 | 4.683372  | 2.836012  |
|  |  | 52 | 1 | 0 | -3.981572 | 3.053896  | 3.054523  |
|  |  | 53 | 1 | 0 | -0.636045 | 3.966302  | -0.917550 |
|  |  | 54 | 1 | 0 | -0.214829 | 3.297545  | -3.870087 |
|  |  | 55 | 1 | 0 | 1.370172  | 5.273718  | -2.136501 |
|  |  | 56 | 1 | 0 | 3.321391  | 3.873427  | -2.673317 |
|  |  | 57 | 1 | 0 | -3.286632 | -0.359207 | -2.421957 |
|  |  | 58 | 1 | 0 | -5.010025 | -1.801634 | -3.447172 |
|  |  | 59 | 1 | 0 | -6.678895 | -2.965857 | -2.021393 |
|  |  | 60 | 1 | 0 | -6.621244 | -2.659106 | 0.446151  |
|  |  | 61 | 1 | 0 | -4.919579 | -1.204572 | 1.472043  |
|  |  | 62 | 1 | 0 | 3.275556  | 0.104636  | 2.239307  |
|  |  | 63 | 1 | 0 | 5.227013  | -1.105687 | 3.146638  |
|  |  | 64 | 1 | 0 | 6.870822  | -2.155508 | 1.609386  |
|  |  | 65 | 1 | 0 | 6.562996  | -1.974834 | -0.849039 |
|  |  | 66 | 1 | 0 | 4.625278  | -0.742135 | -1.767793 |
|  |  | 67 | 6 | 0 | -1.425225 | -3.826835 | -0.213115 |
|  |  | 68 | 1 | 0 | -0.783832 | -3.216433 | 1.755583  |
|  |  | 69 | 1 | 0 | -1.579527 | -1.941065 | 0.815845  |
|  |  | 70 | 6 | 0 | -1.452907 | -5.137977 | 0.028281  |
|  |  | 71 | 1 | 0 | -1.788497 | -3.434964 | -1.160079 |
|  |  | 72 | 1 | 0 | -1.841514 | -5.836562 | -0.705513 |
|  |  | 73 | 1 | 0 | -1.098125 | -5.560095 | 0.965106  |

#### IV References

- 1 For the preparation of **1** see: R. Hrdina, M. Dračínský, I. Valterová, J. Hodačová, I. Císařová and M. Katora, *Adv. Synth. Catal.*, 2008, **350**, 1449–1456.
- 2 (a) F. M. Matysik, *Microchim. Acta*, 2008, **160**, 1–14. (b) P. Kubáň and P. C. Hauser, *Anal. Chim. Acta*, 2008, **607**, 15–29.
- 3 J. G. A. Brito-Neto, J. A. F. da Silva, L. Blanes and C. L. do Lago, *Electroanalysis*, 2005, **17**, 1198–1214.
- 4 J. A. F. da Silva and C. L. do Lago, *Anal. Chem.*, 1998, **70**, 4339–4343.
